# Supplementary material for: Starvation-Induced Changes to the Midgut Proteome and Neuropeptides in Manduca sexta
Source: MDPI journal article supplement (doi:10.3390/insects15050325), 2024-05-02
Supplement: s1 [file s1]

**Table S2:** Diet ingredients and preparation for *Manduca sexta* colony rearing in this study.

| <b>Group 1</b>                       |         |
|--------------------------------------|---------|
| Casein                               | 120 g   |
| Toasted Wheat germ                   | 340 g   |
| Torula yeast                         | 40 g    |
| Cholesterol                          | 12 g    |
| Sucrose                              | 120 g   |
| Wesson salt                          | 44 g    |
| Linseed oil                          | 20 ml   |
| Alphacel                             | 20 g    |
| Distilled Water                      | 1400 ml |
| <b>Group 2</b>                       |         |
| Distilled Water                      | 1600 ml |
| Agar                                 | 65 g    |
| <b>Group 3</b>                       |         |
| Ascorbic Acid                        | 20 g    |
| Aureomycin (Chlortetracycline)       | 1.2 g   |
| Methyl paraben                       | 6 g     |
| Choline chloride                     | 4 g     |
| Sodium propionate                    | 6.2 g   |
| Sorbic acid [(2,4)-hexadienoic acid] | 8 g     |
| Vanderzants' Vitamins                | 52.5 g  |
| <b>Other components</b>              |         |
| Distilled water (cold)               | 440 ml  |
| 37% Formaldehyde                     | 2 ml    |
| 4M KOH                               | 20 ml   |

**Diet preparation:**

Group 1 ingredients were added to a blender and blended at LOW speed for 5 min. Group 2 (agar) was prepared in a separate container and was completely dissolved in 1,600 ml of boiling water, stirring constantly. This was allowed to cool to ~60 °C, then was added to the blender and mixed at medium speed. Group 3 ingredients were mixed in a separate container. Once Group 2 ingredients were cooled to ~45 °C, Group 3 ingredients were added with 440 ml water and blended. KOH and formaldehyde were then added and blended for ~2 min until smooth in consistency. Diet was immediately poured into pans (1-3 cm depth) and stored at 4°C until use. Diet was kept for up to 1 week before discarding.
