# Supplementary material for: Starvation-Induced Changes to the Midgut Proteome and Neuropeptides in Manduca sexta
Source: MDPI journal article supplement (doi:10.3390/insects15050325), 2024-05-02
Supplement: s1 [file s1]

**Table S1:** List of neuropeptides in *M. sexta* as annotated in the genome assembly JHU\_Msex\_v1.0 (Gershman et al., 2021).

| Peptide                                                                   | Gene ID      | Protein ID                                                                                     |
|---------------------------------------------------------------------------|--------------|------------------------------------------------------------------------------------------------|
| Adipokinin hormone (AKH)                                                  | LOC115443027 | XP_030024155.2, XP_037297759.1                                                                 |
| Allatostatin-A                                                            | LOC115449048 | XP_030032599.2                                                                                 |
| Allatostatin-C                                                            | LOC115456115 | XP_030040870.1                                                                                 |
| Allatostatin-CC                                                           | LOC115456123 | XP_037294552.1, XP_037294552.1                                                                 |
| Allatotropin-like (AT)                                                    | LOC115441199 | XP_037294817.1                                                                                 |
| Bombyxin-related peptide A                                                | LOC115447814 | XP_030030912.2                                                                                 |
| Bombyxin-related peptide A                                                | LOC115447816 | XP_030030914.2                                                                                 |
| Bombyxin-related peptide A                                                | LOC115447817 | XP_037294793.1                                                                                 |
| Bombyxin-related peptide A                                                | LOC115448889 | XP_037297313.1, XP_037297315.1, XP_037297316.1, XP_037297314.1, XP_037297311.1                 |
| Bombyxin-related peptide A-like                                           | LOC115447818 | XP_030030916.2                                                                                 |
| Bombyxin-related peptide A-like                                           | LOC115447819 | XP_030030917.2                                                                                 |
| Bombyxin-related peptide A-like                                           | LOC115447821 | XP_030030918.2                                                                                 |
| Bombyxin-related peptide B-like                                           | LOC115447807 | XP_030030906.2                                                                                 |
| Bombyxin-related peptide B-like                                           | LOC115447808 | XP_030030907.2                                                                                 |
| Bombyxin-related peptide B-like                                           | LOC115447809 | XP_030030908.2                                                                                 |
| Bombyxin-related peptide B-like                                           | LOC115447810 | XP_030030909.2                                                                                 |
| Bombyxin-related peptide B-like                                           | LOC115447811 | XP_030030910.2                                                                                 |
| Bombyxin-related peptide B-like                                           | LOC115447813 | XP_030030911.2                                                                                 |
| Bombyxin-related peptide B-like                                           | LOC115447823 | XP_030030920.2                                                                                 |
| Bombyxin-related peptide B-like                                           | LOC119189397 | XP_037294792.1                                                                                 |
| Bursicon-like                                                             | LOC115445641 | XP_030027854.2                                                                                 |
| CAPA peptides                                                             | LOC115444678 | XP_030026443.1                                                                                 |
| Cardioactive peptide-like (CCAP)                                          | LOC115450766 | XP_030034735.1                                                                                 |
| CHH-like protein / Ion transport peptide                                  | LOC115451886 | XP_037295133.1, XP_037295131.1, XP_037295130.1                                                 |
| Corticotropin-releasing factor-binding protein-like / diuretic hormone 44 | LOC119188406 | XP_037296706.1                                                                                 |
| Diuretic hormone 1-like                                                   | LOC115450429 | XP_030034305.1, XP_030034306.1, XP_037300155.1                                                 |
| Diuretic hormone 45                                                       | LOC115450420 | XP_030034294.1                                                                                 |
| Diuretic hormone class 2 / Diuretic hormone 31/ Calcitonin-like           | LOC115440347 | XP_030020468.2                                                                                 |
| Diuretic hormone class 2-like                                             | LOC119192129 | XP_037301862.1                                                                                 |
| Ecdysis-triggering hormone (ETH)                                          | LOC115441646 | XP_030022367.1                                                                                 |
| Eclosion hormone-like (EH)                                                | LOC115448567 | XP_030031898.2, XP_037296919.1                                                                 |
| FMRFamide-related peptides                                                | LOC115445022 | XP_030026977.1                                                                                 |
| IDLRF-like peptide                                                        | LOC115440965 | XP_030021367.1                                                                                 |
| Insulin-like growth factor 2 mRNA-binding protein 1                       | LOC115441152 | XP_030021654.1, XP_030021655.1, XP_030021656.1, XP_030021657.1, XP_030021658.1, XP_037299926.1 |
| Insulin-like growth factor 2 mRNA-binding protein 2                       | LOC119191761 | XP_037301523.1                                                                                 |
| Insulin-like growth factor-binding protein complex acid labile subunit    | LOC115442831 | XP_030023865.1                                                                                 |

|                                                              |              |                                                                |
|--------------------------------------------------------------|--------------|----------------------------------------------------------------|
| Insulin-related peptide 2                                    | LOC115456431 | XP_030041353.1, XP_030041354.1, XP_037296580.1                 |
| ITG-like peptide                                             | LOC115439790 | XP_030019642.1, XP_030019643.1                                 |
| ITG-like peptide                                             | LOC119189620 | XP_037295713.1, XP_037295714.1                                 |
| Leucokinin                                                   | LOC115440945 | XP_030021331.2                                                 |
| Myosuppressin (MS)                                           | LOC115440942 | XP_030021327.1, XP_030021328.1                                 |
| Natalisin (NTL)                                              | LOC115455961 | XP_030040656.1, XP_030040654.1, XP_030040655.1                 |
| Neuropeptide CCHamide-1                                      | LOC115447790 | XP_030030881.2, XP_030030889.2                                 |
| Neuropeptide CCHamide-2                                      | LOC115447598 | XP_030030599.1                                                 |
| Neuropeptide F 1 (a and b)                                   | LOC115440163 | XP_030020215.2, XP_037297084.1                                 |
| Neuropeptide IMFamide                                        | LOC115449258 | XP_030032889.2, XP_030032890.2, XP_030032892.2, XP_037296121.1 |
| Neuropeptide SIFamide                                        | LOC115449261 | XP_037296122.1                                                 |
| Neuropeptide-like 4                                          | LOC115450709 | XP_030034651.1                                                 |
| Neuropeptide-like 4                                          | LOC115450699 | XP_030034640.1                                                 |
| Neuropeptide-like 4                                          | LOC119191143 | XP_037300931.1                                                 |
| Neuropeptide-like precursor 1 (NPLP1)                        | LOC115455839 | XP_030040440.2                                                 |
| Orcokinin                                                    | LOC115440296 | XP_030020405.2                                                 |
| Partner of bursicon / Bursicon beta subunit                  | LOC115445642 | XP_030027856.2                                                 |
| PBAN-type neuropeptides                                      | LOC115453743 | XP_030038326.2                                                 |
| Pro-corazonin                                                | LOC115443369 | XP_037296059.1                                                 |
| Pro-neuropeptide Y (NPF2/NPY)                                | LOC115448624 | XP_030031971.1                                                 |
| Proctolin                                                    | LOC115442035 | XP_030022852.2                                                 |
| Prothoracicostatic peptide (Allostatin B)                    | LOC115442476 | XP_030023380.2, XP_037292238.1, XP_037292237.1                 |
| Prothoracicotropic hormone (PTTH)                            | LOC115442546 | XP_030023461.1, XP_030023462.1                                 |
| Putative neuropeptide precursor protein                      | LOC115440253 | XP_030020340.2                                                 |
| Ryamide neuropeptides                                        | LOC115439774 | XP_030019620.1                                                 |
| Short neuropeptide F (sNPF)                                  | LOC115445847 | XP_030028178.1, XP_030028186.1                                 |
| Tachykinins                                                  | LOC115455967 | XP_030040667.1                                                 |
| Thyrostimulin alpha-2 subunit / glycoprotein hormone alpha 2 | LOC115453281 | XP_030037834.2                                                 |
| thyrostimulin beta-5 subunit                                 | LOC115445425 | XP_030027548.1                                                 |
| U-scoloptoxin(20)-Cw1a / Trissin                             | LOC115450769 | XP_030034738.1                                                 |
| U-scoloptoxin(20)-Sm1a / Trissin                             | LOC115450754 | XP_030034722.1                                                 |
| Trissin                                                      | LOC115450767 | XP_030034736.1                                                 |
| Trissin                                                      | LOC115450768 | XP_030034737.1                                                 |
