# Supplementary material for: Starvation-Induced Changes to the Midgut Proteome and Neuropeptides in Manduca sexta
Source: Insects. 2024 May 2;15(5):325. doi: 10.3390/insects15050325 (PMC11121805; doi:10.3390/insects15050325)
Supplement: Supplementary file 1 [file insects-15-00325-s001.zip]

Archive with 4 entries (4 files):
- Figure S1. PCA plot.tif
- Table S1. Manduca neuropeptides 03-22-24 .pdf
- Table S2. Manduca diet.pdf
- Table S3.xlsx
