# Supplementary material for: Starvation-Induced Changes to the Midgut Proteome and Neuropeptides in Manduca sexta
Source: Insects. 2024 May 2;15(5):325. doi: 10.3390/insects15050325 (PMC11121805; doi:10.3390/insects15050325)
Supplement: Supplementary file 1 [file insects-15-00325-s001.zip › Table S3.xlsx]

## Sheet: Supp1
Protein Group ID	Single ProteinID	Gene ID	24h Log Fold Change	24h Adjusted P Value	48h Log Fold Change	48h Adjusted P Value	Combined Log Fold Change	Combined Adjusted P Value	Protein name
XP_030026458.2	XP_030026458.2	LOC115444716	5.86209	0.000591656	3.15456	0.00564693	4.50833	0.000492555	putative cyclin-dependent serine/threonine-protein kinase DDB_G0272797/DDB_G0274007
XP_030021512.1;XP_030021521.1;XP_037303145.1	XP_030021512.1	LOC115441061	5.71615	0.00170523	3.01429	0.0150573	4.36522	0.00117632	uncharacterized LOC115441061, transcript variant X2
XP_030040711.1	XP_030040711.1	LOC115456009	5.05352	0.00154995	2.62638	0.0117556	3.83995	0.000521306	plasma membrane calcium-transporting ATPase 2, transcript variant X2
XP_030027358.2	XP_030027358.2	LOC115445279	3.28373	0.0284166	4.3331	0.00610166	3.80841	0.00105998	nitric oxide synthase-like protein
XP_030030100.2;XP_037302415.1;XP_037302481.1	XP_030030100.2	LOC115447248	3.93995	0.00414716	3.37476	0.00456779	3.65735	0.000280852	flexible cuticle protein 12
XP_030040069.2	XP_030040069.2	LOC115455573	1.86792	0.0446042	4.35901	0.000627701	3.11346	0.0022208	juvenile hormone esterase
XP_030027462.1	XP_030027462.1	LOC115445364	3.2566	0.0106869	2.93069	0.00881461	3.09364	0.00105998	H/ACA ribonucleoprotein complex subunit 1
XP_030034580.1;XP_037294822.1	XP_030034580.1	LOC115450657	2.34078	0.0132818	3.64301	0.000788699	2.9919	0.00108302	vegetative cell wall protein gp1
XP_030028670.1	XP_030028670.1	LOC115446231	3.30851	0.0123779	2.39303	0.0298321	2.85077	0.00139446	ejaculatory bulb-specific protein 3
XP_037294842.1	XP_037294842.1	LOC115453913	2.55581	0.047435	3.09084	0.0187704	2.82333	0.003242	alanine--glyoxylate aminotransferase 2, mitochondrial
XP_030035955.1	XP_030035955.1	LOC115451720	2.56664	0.0123779	2.67167	0.00602085	2.61916	0.000521306	double-strand break repair protein MRE11
XP_037298572.1;XP_037302260.1	XP_037298572.1	LOC119188537	3.05745	0.00926971	1.97794	0.0266886	2.51769	0.0025867	insulin-like growth factor 1 receptor
XP_030036220.1	XP_030036220.1	LOC115451940	2.58873	0.0123779	2.36416	0.0110203	2.47645	0.000743376	aldo-keto reductase family 1 member B1
XP_030020068.1;XP_030020069.1;XP_030020070.1;XP_030020071.1;XP_030020072.1;XP_030020074.1;XP_030020075.1	XP_030020068.1	LOC115440065	1.72498	0.0185604	3.1696	0.00056698	2.44729	0.000736283	endophilin-A, transcript variant X8
XP_030027697.2	XP_030027697.2	LOC115445531	2.80582	0.0155383	1.93262	0.0485595	2.36922	0.00247607	uncharacterized LOC115445531
XP_037295223.1	XP_037295223.1	LOC115444092	1.87004	0.032066	2.8314	0.00414785	2.35072	0.00108302	juvenile hormone esterase-like, transcript variant X3
XP_030033973.2	XP_030033973.2	LOC115450132	1.74614	0.0429454	2.92998	0.00372963	2.33806	0.00384529	uncharacterized LOC115450132
XP_037295649.1	XP_037295649.1	LOC115443095	1.92453	0.0445168	2.64265	0.00977382	2.28359	0.00381192	C-type lectin domain family 4 member M
XP_030035614.1;XP_030035620.1;XP_030035629.1	XP_030035614.1	LOC115451434	2.47055	0.0165145	2.04492	0.0243151	2.25773	0.00933273	CD63 antigen, transcript variant X3
XP_030026461.2	XP_030026461.2	LOC115444718	2.44446	0.00968724	2.05488	0.00977382	2.24967	0.00120265	pollen-specific leucine-rich repeat extensin-like protein 2
XP_030028805.1	XP_030028805.1	LOC115446333	2.52912	0.00968724	1.9653	0.0150104	2.24721	0.000813086	papain
XP_030032222.1	XP_030032222.1	LOC115448798	1.77929	0.0267967	2.63754	0.00372963	2.20842	0.00178099	alpha-crystallin B chain
XP_030020587.1	XP_030020587.1	LOC115440431	2.11984	0.0241589	2.2818	0.0131402	2.20082	0.00139446	uncharacterized LOC115440431
XP_030034471.1;XP_037298627.1;XP_037300941.1	XP_030034471.1	LOC115450553	1.89544	0.0203758	2.39242	0.00493114	2.14393	0.000743376	cytochrome b5
XP_030027538.2	XP_030027538.2	LOC115445417	2.4541	0.0155327	1.8232	0.0354445	2.13865	0.0022208	hrp65 protein-like, transcript variant X2
XP_030027392.1;XP_037298292.1	XP_030027392.1	LOC115445310	1.92581	0.0299305	2.34495	0.00977382	2.13538	0.00137205	cytochrome c oxidase subunit 4 isoform 1, mitochondrial, transcript variant X1
XP_030041249.1	XP_030041249.1	LOC115456366	2.15136	0.0152254	2.02263	0.0126282	2.08699	0.00337822	lymphocyte antigen 75
XP_030027826.2	XP_030027826.2	LOC115445627	2.27379	0.0123779	1.87406	0.016481	2.07392	0.00251903	extensin
XP_030020822.1;XP_030020823.1	XP_030020822.1	LOC115440590	2.46611	0.00926971	1.65285	0.0227346	2.05948	0.00284736	uncharacterized LOC115440590, transcript variant X1
XP_030028135.1	XP_030028135.1	LOC115445817	2.34638	0.0154175	1.73917	0.0354445	2.04277	0.00305173	laminin subunit beta-1
XP_037299829.1	XP_037299829.1	LOC115439918	2.39035	0.0155383	1.69031	0.0436256	2.04033	0.00384529	laminin subunit gamma-1
XP_030028308.1	XP_030028308.1	LOC115445934	1.94856	0.0123779	2.11034	0.00503758	2.02945	0.00108302	thymosin beta, transcript variant X3
XP_030034911.2	XP_030034911.2	LOC115450901	1.70092	0.0195022	2.19873	0.00447658	1.94982	0.000743376	venom carboxylesterase-6
XP_030023738.1	XP_030023738.1	LOC115442730	2.19093	0.0152254	1.64593	0.0322257	1.91843	0.00181989	46 kDa FK506-binding nuclear protein
XP_037299653.1	XP_037299653.1	LOC115439940	2.10796	0.0161587	1.6997	0.0264357	1.90383	0.00258811	laminin subunit alpha-like
XP_037301110.1	XP_037301110.1	LOC119188429	1.84159	0.047435	1.93555	0.0337008	1.88857	0.00426136	heterogeneous nuclear ribonucleoprotein L-like
XP_030030816.2	XP_030030816.2	LOC115447749	1.53808	0.0207644	2.05376	0.00416344	1.79592	0.000943673	mitochondrial-processing peptidase subunit beta
XP_030030218.1	XP_030030218.1	LOC115447336	2.00095	0.00968724	1.4862	0.0172728	1.74357	0.00154748	putative hydroxypyruvate isomerase
XP_030036230.1	XP_030036230.1	LOC115451947	1.58592	0.0237083	1.78881	0.0104108	1.68737	0.00204075	barrier-to-autointegration factor
XP_030033687.1	XP_030033687.1	LOC115449933	1.53382	0.0209758	1.82208	0.00704605	1.67795	0.0022208	translational regulator orb2, transcript variant X1
XP_037292907.1;XP_037292908.1	XP_037292907.1	LOC115450864	2.0091	0.0106869	1.28351	0.0369654	1.6463	0.0025867	heterogeneous nuclear ribonucleoprotein U, transcript variant X3
XP_030025792.1;XP_030025793.1	XP_030025792.1	LOC115444237	1.31941	0.0251436	1.90905	0.00372963	1.61423	0.00108302	protein lethal(2)essential for life, transcript variant X1
XP_037294924.1	XP_037294924.1	LOC115443825	1.45579	0.0370139	1.7632	0.0136742	1.60949	0.0022208	dihydropyrimidinase, transcript variant X2
XP_030022920.1	XP_030022920.1	LOC115442090	1.83786	0.0123779	1.33562	0.0256292	1.58674	0.00177496	protein takeout
XP_030030037.1	XP_030030037.1	LOC115447195	1.50794	0.0242261	1.6619	0.0118021	1.58492	0.00618869	ecdysteroid-regulated 16 kDa protein-like
XP_030037810.2	XP_030037810.2	LOC115453259	1.47646	0.0142629	1.55392	0.00672715	1.51519	0.000743376	peroxiredoxin-2
XP_030020477.2;XP_037302039.1	XP_030020477.2	LOC115440353	1.61034	0.0234213	1.3647	0.0345921	1.48752	0.0319998	MARCKS-related protein 1-B
XP_030030511.1	XP_030030511.1	LOC115447534	1.55657	0.0237083	1.35924	0.0309424	1.4579	0.00545592	splicing factor 3A subunit 1, transcript variant X1
XP_030030156.1;XP_030030157.1	XP_030030156.1	LOC115447288	1.57395	0.0255583	1.30205	0.041017	1.438	0.00587037	scaffold attachment factor B2, transcript variant X2
XP_030031826.1	XP_030031826.1	LOC115448517	1.38213	0.0261446	1.35561	0.0211399	1.36887	0.00258811	uncharacterized LOC115448517
XP_030030897.1	XP_030030897.1	LOC115447802	1.36853	0.0155383	1.29697	0.0131287	1.33275	0.00155997	NHP2-like protein 1
XP_030029344.1;XP_037300869.1	XP_030029344.1	LOC115446709	1.08585	0.0409922	1.52662	0.00775644	1.30624	0.0022208	chromatin assembly factor 1 p55 subunit
XP_030031119.2	XP_030031119.2	LOC115447956	1.33404	0.0267967	1.10595	0.0436256	1.22	0.00404173	probable aminopeptidase NPEPL1, transcript variant X2
XP_030030998.1;XP_030030999.1;XP_030031001.1;XP_030031002.1;XP_030031004.1;XP_030031005.1;XP_030031006.1;XP_030031007.1;XP_030031008.1;XP_030031010.1;XP_037294353.1;XP_037294354.1;XP_037294355.1;XP_037294356.1	XP_030030998.1	LOC115447878	1.29145	0.0261446	1.11582	0.0364437	1.20364	0.00456757	uncharacterized LOC115447878, transcript variant X10
XP_030029479.2	XP_030029479.2	LOC115446820	0.984263	0.0454053	1.08574	0.0255985	1.035	0.00681989	insecticyanin-B-like
XP_030029341.1	XP_030029341.1	LOC115446707	-1.08735	0.0366667	-1.19645	0.019533	-1.1419	0.00346184	39S ribosomal protein L41, mitochondrial
XP_030040484.1	XP_030040484.1	LOC115455863	-1.11097	0.0435865	-1.44932	0.0119571	-1.28015	0.00404173	cytochrome c-like
XP_030025415.2;XP_030025416.2;XP_030025417.2	XP_030025415.2	LOC115443944	-1.41088	0.0207644	-1.27582	0.0224642	-1.34335	0.00284736	NADH-cytochrome b5 reductase 2, transcript variant X2
XP_030029916.1;XP_030029918.1	XP_030029916.1	LOC115447123	-1.36839	0.0429454	-1.62974	0.017059	-1.49907	0.00426942	diacylglycerol O-acyltransferase 1, transcript variant X1
XP_037292967.1	XP_037292967.1	LOC115444176	-1.30541	0.0423599	-1.94288	0.00602085	-1.62414	0.00317829	probable 3-hydroxyacyl-CoA dehydrogenase B0272.3, transcript variant X2
XP_030035608.2	XP_030035608.2	LOC115451431	-1.32786	0.0261446	-1.94996	0.00372963	-1.63891	0.00108302	NEDD8-conjugating enzyme Ubc12
XP_030024656.1	XP_030024656.1	LOC115443409	-1.36735	0.0370139	-1.96975	0.00602085	-1.66855	0.0022208	39S ribosomal protein L37, mitochondrial
XP_030034647.2	XP_030034647.2	LOC115450708	-1.6076	0.0316775	-1.92175	0.0117556	-1.76467	0.00181581	UDP-N-acetylhexosamine pyrophosphorylase-like protein 1
XP_030028976.2	XP_030028976.2	LOC115446445	-1.41261	0.0444296	-2.15999	0.00593	-1.7863	0.0025867	zinc carboxypeptidase
XP_030023792.1	XP_030023792.1	LOC115442781	-2.07305	0.00937928	-1.58273	0.014089	-1.82789	0.000743376	hydroxysteroid dehydrogenase-like protein 2, transcript variant X2
XP_030023969.1	XP_030023969.1	LOC115442905	-1.81664	0.0106869	-1.88648	0.00462373	-1.85156	0.000615211	3-hydroxyacyl-CoA dehydrogenase type-2
XP_030030509.1	XP_030030509.1	LOC115447536	-2.15617	0.0211728	-1.63249	0.0485595	-1.89433	0.00306209	eukaryotic translation initiation factor 6
XP_030041057.1	XP_030041057.1	LOC115456229	-1.66753	0.0480739	-2.21724	0.0131287	-1.94238	0.0266706	thialysine N-epsilon-acetyltransferase
XP_030024504.2;XP_037292542.1	XP_030024504.2	LOC115443289	-1.89451	0.00968724	-2.01491	0.00372963	-1.95471	0.000758463	endoplasmic reticulum resident protein 29
XP_037300776.1	XP_037300776.1	LOC115452228	-2.13612	0.0152254	-1.84695	0.0178067	-1.99154	0.00117632	aquaporin AQPAe.a, transcript variant X3
XP_030032134.1;XP_030032143.1	XP_030032134.1	LOC115448730	-2.279	0.0104766	-1.70459	0.0185193	-1.9918	0.0052838	epidermal retinol dehydrogenase 2, transcript variant X2
XP_030040033.1	XP_030040033.1	LOC115455549	-2.02322	0.0456279	-1.99023	0.041383	-2.00673	0.00980528	Krueppel homolog 2
XP_037295744.1	XP_037295744.1	LOC115447104	-2.31086	0.00968724	-1.76117	0.015561	-2.03602	0.00560953	myrosinase 1
XP_030035113.2	XP_030035113.2	LOC115451059	-1.51457	0.0259069	-2.6051	0.00132921	-2.05983	0.0015994	3-ketoacyl-CoA thiolase, mitochondrial-like
XP_037298658.1;XP_037298659.1	XP_037298658.1	LOC115454538	-1.30741	0.0209758	-2.81575	0.000291165	-2.06158	0.00137205	probable peroxisomal acyl-coenzyme A oxidase 1, transcript variant X1
XP_037294369.1	XP_037294369.1	LOC115442812	-2.51741	0.00968724	-1.64619	0.0301764	-2.0818	0.00137309	peroxisomal membrane protein PEX14
XP_037295212.1	XP_037295212.1	LOC115446525	-1.8348	0.0391455	-2.38003	0.0104422	-2.10741	0.0022208	putative phosphatidate phosphatase
XP_030027851.2	XP_030027851.2	LOC115445638	-2.09384	0.0366667	-2.12495	0.0279794	-2.10939	0.00284736	CAAX prenyl protease 1 homolog
XP_030035846.2;XP_030035847.2;XP_030035848.2;XP_037295736.1;XP_037295737.1	XP_030035846.2	LOC115451623	-2.57652	0.0123779	-1.68799	0.0390032	-2.13225	0.00459219	translocator protein, transcript variant X5
XP_030032265.2	XP_030032265.2	LOC115448826	-1.72711	0.0397244	-2.5438	0.00593	-2.13545	0.00246523	juvenile hormone epoxide hydrolase
XP_037300114.1;XP_037300115.1	XP_037300114.1	LOC115449195	-2.35625	0.0143936	-1.94665	0.0196875	-2.15145	0.00137205	ATP-dependent translocase ABCB1, transcript variant X2
XP_030026291.1	XP_030026291.1	LOC115444597	-1.83492	0.0350386	-2.50044	0.00723603	-2.16768	0.00139446	thymidylate synthase
XP_030034216.1	XP_030034216.1	LOC115450360	-2.21533	0.0188937	-2.18087	0.0144721	-2.1981	0.00251903	uncharacterized LOC115450360
XP_030028836.1	XP_030028836.1	LOC115446355	-2.48998	0.00926971	-2.05696	0.00953833	-2.27347	0.000675046	D-altritol 5-dehydrogenase
XP_030030258.1	XP_030030258.1	LOC115447367	-1.34214	0.0375891	-3.23124	0.000390408	-2.28669	0.0025867	uncharacterized LOC115447367
XP_030021537.1	XP_030021537.1	LOC115441080	-2.61748	0.0120398	-1.97458	0.0202529	-2.29603	0.00404173	1-acyl-sn-glycerol-3-phosphate acyltransferase gamma
XP_030039662.1;XP_037300515.1	XP_030039662.1	LOC115455114	-2.66925	0.0155383	-1.92366	0.0406852	-2.29646	0.0022208	ubiquitin-like protein 5, transcript variant X2
XP_030041184.1	XP_030041184.1	LOC115456308	-2.01118	0.0441285	-2.68453	0.0110963	-2.34786	0.00305173	mannose-P-dolichol utilization defect 1 protein homolog
XP_030040150.1	XP_030040150.1	LOC115455643	-1.64109	0.0261446	-3.05845	0.000839223	-2.34977	0.00193236	alpha-tocopherol transfer protein-like
XP_030023348.2	XP_030023348.2	LOC115442453	-1.89414	0.0465518	-2.92305	0.00600725	-2.4086	0.00326268	carboxypeptidase B
XP_030035843.1;XP_030035844.1;XP_030035845.1	XP_030035843.1	LOC115451622	-2.97945	0.00818403	-1.90445	0.0256292	-2.44195	0.0011594	translocator protein, transcript variant X2
XP_030027985.1	XP_030027985.1	LOC115445734	-2.66857	0.027062	-2.29118	0.0390291	-2.47988	0.0322569	sodium- and chloride-dependent glycine transporter 1
XP_030035550.2;XP_030035551.2	XP_030035550.2	LOC115451394	-3.05638	0.0115893	-1.93048	0.041429	-2.49343	0.0025768	oxygen-dependent coproporphyrinogen-III oxidase, transcript variant X1
XP_037297181.1	XP_037297181.1	LOC115453550	-3.16661	0.00271791	-1.86116	0.015561	-2.51389	0.000675046	proton channel OtopLc
XP_030030627.1	XP_030030627.1	LOC115447616	-2.21654	0.0167814	-2.86721	0.00372963	-2.54187	0.000645575	peroxiredoxin
XP_030026278.2;XP_030026279.2;XP_037295060.1	XP_030026278.2	LOC115444590	-2.48794	0.0123779	-2.63393	0.00565785	-2.56094	0.000521306	aldehyde dehydrogenase, dimeric NADP-preferring, transcript variant X3
XP_030031455.1	XP_030031455.1	LOC115448232	-2.14927	0.0332254	-3.02227	0.00583287	-2.58577	0.0022208	mitochondrial glutamate carrier 1
XP_030020934.1;XP_030020935.1	XP_030020934.1	LOC115440666	-2.12578	0.0312054	-3.07292	0.0047841	-2.59935	0.00306209	oxamate amidohydrolase proenzyme, transcript variant X2
XP_030020466.1	XP_030020466.1	LOC115440346	-2.56275	0.0159405	-2.6915	0.00851034	-2.62712	0.00346184	phosphoglycolate phosphatase 1A, chloroplastic
XP_030021117.2	XP_030021117.2	LOC115440790	-2.86919	0.0028906	-2.69349	0.00184166	-2.78134	0.000492555	esterase FE4
XP_030028688.2	XP_030028688.2	LOC115446243	-2.02549	0.0123779	-3.58165	0.000358013	-2.80357	0.000417385	uncharacterized LOC115446243
XP_037295558.1	XP_037295558.1	LOC115445508	-1.86212	0.0209758	-3.80975	0.000390408	-2.83593	0.000813086	peroxisomal acyl-coenzyme A oxidase 3
XP_030026609.1;XP_030026610.1	XP_030026609.1	LOC115444821	-3.0157	0.00968724	-2.70967	0.00735097	-2.86269	0.000492555	short-chain specific acyl-CoA dehydrogenase, mitochondrial, transcript variant X1
XP_030020706.2	XP_030020706.2	LOC115440503	-2.29049	0.0142492	-3.518	0.000869042	-2.90425	0.000521306	organic cation transporter protein
XP_030036352.2;XP_030036361.2;XP_037293807.1;XP_037301428.1;XP_037301429.1	XP_030036352.2	LOC115452048	-2.34366	0.0123779	-3.80912	0.00056698	-3.07639	0.000743376	ommochrome-binding protein-like, transcript variant X3
XP_030027415.1	XP_030027415.1	LOC115445326	-2.04687	0.0290078	-4.15856	0.000627701	-3.10272	0.00110871	maltase A1
XP_037300887.1;XP_037301730.1	XP_037300887.1	LOC119191108	-2.35322	0.0206117	-3.95516	0.000981054	-3.15419	0.000687678	antichymotrypsin-2-like
XP_030037221.2;XP_037300534.1	XP_030037221.2	LOC115452761	-2.90639	0.0192053	-3.43563	0.00610166	-3.17101	0.000736283	estradiol 17-beta-dehydrogenase 8
XP_030029482.2	XP_030029482.2	LOC115446822	-2.56605	0.00968724	-3.95564	0.000452197	-3.26084	0.000191169	N-acetylneuraminate lyase
XP_030034970.1	XP_030034970.1	LOC115450938	-2.58667	0.0123779	-4.09994	0.000621851	-3.3433	0.000675046	uncharacterized LOC115450938
XP_030023330.2	XP_030023330.2	LOC115442441	-2.75459	0.0224384	-3.9783	0.00319926	-3.36645	0.000743376	venom acid phosphatase Acph-1
XP_030038272.1	XP_030038272.1	LOC115453693	-2.54245	0.0480739	-4.24899	0.00468757	-3.39572	0.00208539	15-hydroxyprostaglandin dehydrogenase [NAD(+)]
XP_030035858.1	XP_030035858.1	LOC115451633	-2.43004	0.0137274	-4.63141	0.000279335	-3.53072	0.000521306	uncharacterized LOC115451633
XP_037294570.1	XP_037294570.1	LOC119189357	-3.69477	0.0123779	-3.40811	0.00988968	-3.55144	0.0015994	39S ribosomal protein S18a, mitochondrial-like
XP_030024172.2	XP_030024172.2	LOC115443044	-2.29561	0.0123779	-4.83558	7.09716e-05	-3.56559	0.000502743	lysozyme
XP_037303289.1;XP_037303295.1	XP_037303289.1	LOC115451348	-2.62079	0.00545391	-4.56456	7.09716e-05	-3.59268	0.000154638	gelsolin, transcript variant X2
XP_037295852.1	XP_037295852.1	LOC115455094	-3.42071	0.0123779	-4.19826	0.00245947	-3.80948	0.000753329	ileal sodium/bile acid cotransporter, transcript variant X2
XP_030024219.1	XP_030024219.1	LOC115443093	-2.89136	0.0408767	-4.73691	0.00391159	-3.81414	0.00126284	PXMP2/4 family protein 3
XP_037295058.1	XP_037295058.1	LOC115451052	-3.96693	0.00170523	-3.6986	0.000788699	-3.83277	3.00957e-05	3-ketoacyl-CoA thiolase, mitochondrial
XP_030020670.2	XP_030020670.2	LOC115440483	-4.70995	0.0152254	-3.19006	0.0480407	-3.95	0.00284736	organic cation transporter protein
XP_037292715.1;XP_037292722.1;XP_037292725.1	XP_037292715.1	LOC115451632	-3.32376	0.0123779	-4.84988	0.000805393	-4.08682	0.000243929	uncharacterized LOC115451632, transcript variant X2
XP_037295799.1	XP_037295799.1	LOC119189637	-2.15505	0.0261446	-6.14529	6.40919e-05	-4.15017	0.00398329	myrosinase 1-like
XP_037295803.1	XP_037295803.1	LOC115455155	-2.74502	0.0188937	-5.68236	0.000291165	-4.21369	0.00105559	lactase-phlorizin hydrolase
XP_030029542.2	XP_030029542.2	LOC115446870	-4.26021	0.000504129	-4.5732	6.83728e-05	-4.41671	4.80451e-06	pancreatic lipase-related protein 2-like
XP_030029246.1;XP_030029247.1;XP_030029248.1;XP_037297184.1	XP_030029246.1	LOC115446648	-3.47416	0.00305887	-5.3672	7.09716e-05	-4.42068	5.06497e-05	lysosomal acid glucosylceramidase, transcript variant X3
XP_030034558.1	XP_030034558.1	LOC115450644	-4.55109	0.00233548	-4.67133	0.000789582	-4.61121	3.00957e-05	delta(7)-sterol 5(6)-desaturase erg32
XP_030040408.1	XP_030040408.1	LOC115455814	-5.16262	0.0163094	-4.09747	0.0290394	-4.63005	0.00239848	arylphorin subunit alpha-like
XP_030033565.1;XP_030033572.1	XP_030033565.1	LOC115449809	-3.46629	0.00414716	-6.02306	6.40919e-05	-4.74468	0.000124186	high affinity copper uptake protein 1, transcript variant X1
XP_030021372.2	XP_030021372.2	LOC115440970	-3.68487	0.000129429	-6.13156	4.77534e-07	-4.90822	1.63268e-05	trypsin, alkaline C-like
XP_030032387.1	XP_030032387.1	LOC115448905	-4.06452	0.0022237	-6.34823	6.40919e-05	-5.20638	5.06497e-05	sensory neuron membrane protein 2
XP_030032224.1	XP_030032224.1	LOC115448803	-5.16666	0.00190419	-5.64898	0.000456609	-5.40782	3.00957e-05	uncharacterized LOC115448803
XP_037295801.1	XP_037295801.1	LOC115453032	-4.16666	0.00190419	-7.16374	3.80587e-05	-5.6652	0.000146347	lactase-phlorizin hydrolase
XP_030024923.2	XP_030024923.2	LOC115443600	0.682168	0.514938	4.40476	0.00197437	2.54347	0.0245974	uncharacterized LOC115443600
XP_030030806.2	XP_030030806.2	LOC115447738	2.27747	0.080414	4.27344	0.00599096	3.27545	0.00306209	uncharacterized LOC115447738
XP_037303132.1	XP_037303132.1	LOC119193589	1.89872	0.0552588	3.50334	0.00372963	2.70103	0.00198749	chitin deacetylase 8-like
XP_030031548.2	XP_030031548.2	LOC115448295	1.32069	0.185538	3.38794	0.00610166	2.35431	0.00886985	glucose 1-dehydrogenase 2-like
XP_037303384.1	XP_037303384.1	LOC115440935	1.65449	0.0855168	3.31486	0.00491503	2.48468	0.00404173	trypsin, alkaline C-like
XP_037292207.1	XP_037292207.1	LOC115447734	1.72291	0.0875502	3.12468	0.00804957	2.4238	0.0187734	uncharacterized LOC115447734
XP_030022462.2	XP_030022462.2	LOC115441709	1.34074	0.209314	3.12044	0.0129192	2.23059	0.0129613	pancreatic triacylglycerol lipase
XP_030021912.1;XP_037301999.1;XP_037302943.1	XP_030021912.1	LOC115441314	0.858231	0.472648	3.06505	0.0217642	1.96164	0.0453175	putative inorganic phosphate cotransporter
XP_030031149.2	XP_030031149.2	LOC115447992	0.993609	0.160111	3.04516	0.00190759	2.01939	0.0087764	failed axon connections
XP_030024925.1	XP_030024925.1	LOC115443601	0.539773	0.510596	2.97425	0.00461842	1.75701	0.0271367	uncharacterized LOC115443601, transcript variant X1
XP_037299382.1	XP_037299382.1	LOC115450765	1.15997	0.106797	2.89735	0.00239561	2.02866	0.00875999	pyrimidodiazepine synthase
XP_030030290.1	XP_030030290.1	LOC115447398	1.5697	0.156372	2.88402	0.019533	2.22686	0.0223848	chitin deacetylase 8
XP_030022408.2;XP_030022409.2;XP_030022410.2;XP_030022411.2	XP_030022408.2	LOC115441676	0.868135	0.129259	2.84262	0.000771142	1.85538	0.00471068	protein ref(2)P, transcript variant X2
XP_030029375.1	XP_030029375.1	LOC115446739	1.82516	0.126749	2.83553	0.0280571	2.33034	0.0282608	microvitellogenin-like
XP_030023768.2;XP_037292403.1	XP_030023768.2	LOC115442754	1.31683	0.130287	2.83191	0.00715683	2.07437	0.00589893	uncharacterized LOC115442754
XP_030022143.1	XP_030022143.1	LOC115441474	1.02899	0.144089	2.8161	0.00289881	1.92255	0.0127327	STE20/SPS1-related proline-alanine-rich protein kinase
XP_030041235.1	XP_030041235.1	LOC115456357	1.40134	0.171384	2.60651	0.0223782	2.00393	0.0490727	lymphocyte antigen 75
XP_030036867.1;XP_030036874.1;XP_030036880.1	XP_030036867.1	LOC115452461	1.66437	0.0701795	2.56588	0.0118413	2.11512	0.00540556	alpha-actinin, sarcomeric, transcript variant X3
XP_030027753.1;XP_030027754.1;XP_037296900.1;XP_037301379.1;XP_037301381.1	XP_030027753.1	LOC115445575	0.364347	0.601773	2.46989	0.0047841	1.41712	0.0413097	protein CREG1, transcript variant X2
XP_030022463.2	XP_030022463.2	LOC115441710	1.50274	0.104165	2.46776	0.0161007	1.98525	0.0113684	pancreatic triacylglycerol lipase
XP_037292850.1	XP_037292850.1	LOC115453523	0.735759	0.41182	2.44537	0.0179513	1.59057	0.03347	CCAAT/enhancer-binding protein zeta
XP_030023426.1;XP_037299461.1	XP_030023426.1	LOC115442516	0.522308	0.413576	2.43984	0.0040654	1.48107	0.0293211	U2 small nuclear ribonucleoprotein A', transcript variant X1
XP_037295285.1	XP_037295285.1	LOC115448866	1.92601	0.0507501	2.37897	0.0193861	2.15249	0.00864097	alpha-N-acetylgalactosaminidase
XP_030021124.1	XP_030021124.1	LOC115440797	1.24921	0.0711821	2.34667	0.00491503	1.79794	0.00284736	nucleoporin Nup43
XP_030032776.1;XP_037293349.1	XP_030032776.1	LOC115449185	0.939783	0.244321	2.292	0.0148562	1.61589	0.0200436	probable 4-coumarate--CoA ligase 3, transcript variant X2
XP_030034180.2	XP_030034180.2	LOC115450327	0.825596	0.255736	2.26408	0.00977382	1.54484	0.0165864	NADH dehydrogenase [ubiquinone] 1 alpha subcomplex subunit 10, mitochondrial
XP_037295245.1	XP_037295245.1	LOC115451806	1.1948	0.0926497	2.16914	0.00881461	1.68197	0.00457842	nucleoporin SEH1
XP_030031294.2	XP_030031294.2	LOC115448118	0.718589	0.296941	2.13589	0.0102272	1.42724	0.0266415	pyruvate dehydrogenase E1 component subunit beta, mitochondrial
XP_030030692.1	XP_030030692.1	LOC115447654	2.08029	0.0536816	2.08739	0.0481213	2.08384	0.014933	NADH dehydrogenase [ubiquinone] 1 subunit C2
XP_030020686.1	XP_030020686.1	LOC115440492	1.85389	0.051235	2.07597	0.0299509	1.96493	0.00834948	protein phosphatase methylesterase 1
XP_037301304.1;XP_037301305.1;XP_037301306.1;XP_037301307.1	XP_037301304.1	LOC119191519	0.956307	0.144435	2.05618	0.00881461	1.50624	0.00874439	uncharacterized LOC119191519, transcript variant X2
XP_030040211.2	XP_030040211.2	LOC115455687	1.51382	0.0593596	2.01999	0.0173698	1.7669	0.00861041	protein adenylyltransferase SelO
XP_030025539.2;XP_030027888.1	XP_030025539.2	LOC115444057	1.31377	0.0777399	1.95449	0.0158434	1.63413	0.00471068	ATP synthase subunit beta, mitochondrial
XP_030022441.2;XP_037298717.1	XP_030022441.2	LOC115441692	0.797778	0.245873	1.94088	0.015084	1.36933	0.0440375	SHC-transforming protein 1, transcript variant X1
XP_030035461.2	XP_030035461.2	LOC115451314	0.783257	0.182884	1.85709	0.00881461	1.32018	0.0213234	uncharacterized LOC115451314
XP_030040114.2;XP_030040116.2;XP_030040117.2;XP_037292510.1	XP_030040114.2	LOC115455625	0.692092	0.264409	1.85463	0.0118413	1.27336	0.0453448	coronin-6, transcript variant X3
XP_037295220.1	XP_037295220.1	LOC119189486	0.767732	0.146233	1.83713	0.00561175	1.30243	0.00852682	venom carboxylesterase-6-like
XP_030030012.2	XP_030030012.2	LOC115447174	1.02368	0.134412	1.77791	0.019533	1.40079	0.012553	CDK5 regulatory subunit-associated protein 3
XP_030033788.2;XP_030033789.1	XP_030033788.2	LOC115450023	0.849827	0.132954	1.7668	0.00881461	1.30832	0.00786892	cathepsin L, transcript variant X1
XP_030033709.2;XP_030033710.2	XP_030033709.2	LOC115449952	1.09872	0.0836058	1.67776	0.0158434	1.38824	0.00551956	membrane-bound alkaline phosphatase, transcript variant X3
XP_030034996.2	XP_030034996.2	LOC115450960	0.257671	0.629022	1.67766	0.00768735	0.967664	0.0485038	protein arginine methyltransferase NDUFAF7 homolog, mitochondrial
XP_030029065.2	XP_030029065.2	LOC115446522	0.654369	0.281935	1.50338	0.0265419	1.07887	0.0299816	inactive selenide, water dikinase-like protein
XP_030029903.1	XP_030029903.1	LOC115447110	0.832331	0.132134	1.46058	0.0182033	1.14645	0.0184311	zinc finger protein on ecdysone puffs, transcript variant X1
XP_030020915.2	XP_030020915.2	LOC115440657	1.38879	0.051235	1.42976	0.0414135	1.40927	0.00589893	proline-rich receptor-like protein kinase PERK13
XP_030035494.1	XP_030035494.1	LOC115451344	1.30675	0.0591108	1.41025	0.0411536	1.3585	0.0422274	gelsolin
XP_030040413.1	XP_030040413.1	LOC115455816	0.57038	0.323507	1.36895	0.0325993	0.969664	0.0422274	FAS-associated factor 2
XP_030024721.1	XP_030024721.1	LOC115443454	0.445029	0.374928	1.34421	0.0194733	0.894618	0.0378424	endoplasmic reticulum resident protein 44
XP_030029028.1	XP_030029028.1	LOC115446501	0.780117	0.0765521	1.22525	0.0125958	1.00268	0.00606392	transitional endoplasmic reticulum ATPase TER94
XP_037294872.1	XP_037294872.1	LOC115456013	1.0165	0.0731257	1.19774	0.0389516	1.10712	0.00956198	tyrosine-protein phosphatase 69D
XP_030041406.1	XP_030041406.1	LOC115456460	0.415688	0.364818	1.07783	0.0335364	0.746759	0.0477068	nucleoplasmin-like protein, transcript variant X2
XP_030025372.2	XP_030025372.2	LOC115443907	-0.743305	0.143648	-1.13753	0.0372266	-0.940416	0.0269799	aldehyde dehydrogenase X, mitochondrial
XP_030023573.1	XP_030023573.1	LOC115442619	-0.675896	0.233381	-1.21084	0.0474468	-0.943367	0.0453175	39S ribosomal protein L17, mitochondrial
XP_030040887.1	XP_030040887.1	LOC115456122	-0.89477	0.105559	-1.31214	0.0264854	-1.10346	0.00980528	glutaryl-CoA dehydrogenase, mitochondrial
XP_030029593.1;XP_037294738.1	XP_030029593.1	LOC115446901	-0.94312	0.072847	-1.32694	0.018628	-1.13503	0.0103018	glycerol-3-phosphate phosphatase, transcript variant X2
XP_037299583.1	XP_037299583.1	LOC115450830	-0.844029	0.0814252	-1.32946	0.013717	-1.08674	0.0112975	isovaleryl-CoA dehydrogenase, mitochondrial
XP_030026070.2	XP_030026070.2	LOC115444432	-0.519674	0.321145	-1.33357	0.0237053	-0.926623	0.0402797	cysteine synthase, transcript variant X2
XP_037303069.1	XP_037303069.1	LOC115454222	-0.733895	0.137187	-1.40937	0.0134727	-1.07163	0.0106653	thioredoxin domain-containing protein 9
XP_037295090.1;XP_037295091.1;XP_037301439.1	XP_037295090.1	LOC119188329	-1.11815	0.0837033	-1.42159	0.0354445	-1.26987	0.0108935	CCHC-type zinc finger protein CG3800, transcript variant X1
XP_030024220.2	XP_030024220.2	LOC115443094	-0.663142	0.167595	-1.42422	0.0118021	-1.04368	0.0182785	thioredoxin domain-containing protein 17
XP_037300817.1	XP_037300817.1	LOC119191061	-0.950888	0.12589	-1.42649	0.0325993	-1.18869	0.0127327	xaa-Pro aminopeptidase 3-like
XP_030021506.1;XP_037299440.1	XP_030021506.1	LOC115441058	-0.685713	0.327571	-1.50231	0.0481213	-1.09401	0.0453448	dihydrolipoyl dehydrogenase-like, transcript variant X1
XP_037301059.1	XP_037301059.1	LOC115454040	-0.618314	0.285425	-1.50797	0.0212727	-1.06314	0.0269799	aldo-keto reductase AKR2E4
XP_030037512.1	XP_030037512.1	LOC115453021	-1.02299	0.121935	-1.50982	0.0325993	-1.26641	0.011654	endothelial differentiation-related factor 1 homolog
XP_030032032.1;XP_030032034.1	XP_030032032.1	LOC115448672	-0.74309	0.163454	-1.54482	0.0130469	-1.14395	0.0153969	NADH dehydrogenase [ubiquinone] 1 alpha subcomplex assembly factor 2, transcript variant X1
XP_030037772.1	XP_030037772.1	LOC115453229	-0.962593	0.0956635	-1.59936	0.0141222	-1.28098	0.00718779	probable 39S ribosomal protein L45, mitochondrial
XP_030036569.2;XP_037303609.1;XP_037303610.1	XP_030036569.2	LOC115452242	-1.00496	0.15361	-1.60407	0.0352864	-1.30452	0.0178468	malignant T-cell-amplified sequence 1 homolog, transcript variant X1
XP_030040422.2;XP_030040424.2	XP_030040422.2	LOC115455821	-1.23204	0.0659888	-1.6194	0.0211364	-1.42572	0.00643298	2-hydroxyacyl-CoA lyase 1, transcript variant X3
XP_030020369.2;XP_037295963.1	XP_030020369.2	LOC115440277	-0.520841	0.318121	-1.69639	0.00836672	-1.10861	0.0384976	isochorismatase domain-containing protein 1, transcript variant X1
XP_030025284.2	XP_030025284.2	LOC115443841	-1.10341	0.129259	-1.69805	0.0305379	-1.40073	0.0126964	glyoxylate reductase/hydroxypyruvate reductase
XP_030029014.1	XP_030029014.1	LOC115446479	-0.480345	0.443453	-1.73229	0.0164794	-1.10632	0.0441671	mesencephalic astrocyte-derived neurotrophic factor homolog
XP_030040236.1	XP_030040236.1	LOC115455706	-0.880413	0.0890841	-1.77669	0.00506041	-1.32855	0.00426136	probable malate dehydrogenase, mitochondrial
XP_030033451.1;XP_037293966.1	XP_030033451.1	LOC115449706	-1.10726	0.0889185	-1.80994	0.0134727	-1.4586	0.0224537	succinate dehydrogenase [ubiquinone] cytochrome b small subunit, mitochondrial, transcript variant X1
XP_030035910.2	XP_030035910.2	LOC115451683	-1.02531	0.157429	-1.81255	0.0234513	-1.41893	0.0181491	chymotrypsin-2
XP_030028980.2	XP_030028980.2	LOC115446448	-0.993244	0.133275	-1.84335	0.0148562	-1.4183	0.0330646	zinc carboxypeptidase
XP_030036708.2;XP_030036709.2;XP_030036711.2;XP_030036712.2	XP_030036708.2	LOC115452350	-0.994737	0.133166	-1.86004	0.0143066	-1.42739	0.0189463	fructose-bisphosphate aldolase, transcript variant X4
XP_030024632.1	XP_030024632.1	LOC115443397	-0.975927	0.087777	-1.86886	0.00610166	-1.42239	0.024308	cystathionine beta-synthase
XP_037299519.1;XP_037299520.1	XP_037299519.1	LOC115454371	-0.685421	0.331383	-1.88263	0.019533	-1.28402	0.029079	aminoacylase-1-like, transcript variant X2
XP_030035383.1	XP_030035383.1	LOC115451273	-0.775928	0.252602	-1.88392	0.0158434	-1.32992	0.0209388	protein transport protein Sec61 subunit alpha
XP_037299419.1	XP_037299419.1	LOC115452619	-1.13237	0.125791	-1.91088	0.019533	-1.52162	0.0217516	N-methyl-L-tryptophan oxidase-like
XP_030036288.2	XP_030036288.2	LOC115452004	-1.5077	0.068276	-2.02461	0.0199934	-1.76615	0.00456757	cytosolic Fe-S cluster assembly factor nubp1-A
XP_030029150.2	XP_030029150.2	LOC115446576	-1.12886	0.220442	-2.03238	0.0411536	-1.58062	0.0223659	28S ribosomal protein S29, mitochondrial
XP_030022553.1;XP_037293022.1	XP_030022553.1	LOC115441788	-1.09197	0.150198	-2.03611	0.0176317	-1.56404	0.0364927	glutathione S-transferase 2-like, transcript variant X2
XP_030032732.2	XP_030032732.2	LOC115449144	-1.10272	0.184928	-2.09169	0.0235557	-1.5972	0.0162005	membrane alanyl aminopeptidase-like
XP_037297144.1;XP_037297145.1;XP_037297146.1;XP_037297147.1	XP_037297144.1	LOC115449997	-1.0026	0.0608361	-2.14671	0.00190759	-1.57465	0.00575581	spondin-1, transcript variant X4
XP_030022659.1	XP_030022659.1	LOC115441882	-0.701661	0.384722	-2.1791	0.0188869	-1.44038	0.0453426	39S ribosomal protein L51, mitochondrial
XP_030020368.2	XP_030020368.2	LOC115440277	-0.485106	0.480017	-2.22003	0.00786139	-1.35257	0.035072	isochorismatase domain-containing protein 1, transcript variant X1
XP_030020027.2	XP_030020027.2	LOC115440035	-0.648642	0.388461	-2.27163	0.0117556	-1.46014	0.0280066	enoyl-CoA delta isomerase 1, mitochondrial
XP_030030364.2	XP_030030364.2	LOC115447462	-0.542842	0.384188	-2.27702	0.00491503	-1.40993	0.0271367	luciferin 4-monooxygenase
XP_030026168.1	XP_030026168.1	LOC115444514	-1.90769	0.0733881	-2.30563	0.0354445	-2.10666	0.00865443	protein ERGIC-53
XP_030029680.1	XP_030029680.1	LOC115446969	-1.27032	0.119348	-2.32653	0.0128388	-1.79842	0.00695379	retinol dehydrogenase 13
XP_030023102.1;XP_030023103.1	XP_030023102.1	LOC115442236	-1.17521	0.117178	-2.3348	0.00849702	-1.75501	0.0172352	SPARC, transcript variant X2
XP_030035212.2	XP_030035212.2	LOC115451137	-0.782729	0.158824	-2.37903	0.00190759	-1.58088	0.00695379	plexin-A2
XP_030027241.1	XP_030027241.1	LOC115445188	-0.91812	0.109554	-2.39684	0.00195483	-1.65748	0.00451103	superoxide dismutase [Cu-Zn]-like
XP_037303129.1	XP_037303129.1	LOC119193561	-0.877581	0.314772	-2.40646	0.0170543	-1.64202	0.0226051	putative aminopeptidase W07G4.4
XP_030026000.1	XP_030026000.1	LOC115444379	-1.0894	0.12282	-2.41413	0.00563968	-1.75176	0.00738668	cytidine deaminase
XP_030021493.1	XP_030021493.1	LOC115441052	-0.833245	0.0888764	-2.45968	0.000627701	-1.64646	0.0038775	coiled-coil domain-containing protein 25
XP_030036335.2;XP_030036336.2	XP_030036335.2	LOC115452035	-0.811634	0.247279	-2.47906	0.00561175	-1.64535	0.0186207	delta(3,5)-Delta(2,4)-dienoyl-CoA isomerase, mitochondrial, transcript variant X2
XP_030023198.1;XP_030023199.1;XP_030023201.1	XP_030023198.1	LOC115442335	-1.31765	0.0834112	-2.49261	0.00600725	-1.90513	0.00400021	sodium/calcium exchanger regulatory protein 1, transcript variant X1
XP_030027624.2	XP_030027624.2	LOC115445481	-0.833165	0.410531	-2.49727	0.0266813	-1.66522	0.0407598	membrane-bound alkaline phosphatase
XP_030021208.2	XP_030021208.2	LOC115440853	-1.2641	0.127805	-2.50955	0.00988968	-1.88682	0.0199826	monocarboxylate transporter 4, transcript variant X1
XP_030036696.2	XP_030036696.2	LOC115452335	-0.880203	0.125458	-2.51382	0.00160027	-1.69701	0.00491324	xaa-Pro dipeptidase, transcript variant X2
XP_030037568.2;XP_037301090.1	XP_030037568.2	LOC115453066	-1.35169	0.134832	-2.51514	0.0150104	-1.93342	0.0158046	collagenase
XP_030040964.1	XP_030040964.1	LOC115456165	-1.15595	0.155222	-2.5503	0.00881461	-1.85312	0.00980528	dnaJ homolog subfamily C member 3
XP_030027625.1	XP_030027625.1	LOC115445482	-1.45393	0.131068	-2.62099	0.0157711	-2.03746	0.0257352	membrane-bound alkaline phosphatase
XP_030035177.2;XP_030035178.2;XP_037301335.1;XP_037301336.1;XP_037301361.1;XP_037301362.1;XP_037301363.1;XP_037301364.1;XP_037301365.1	XP_030035177.2	LOC115451109	-0.857601	0.318121	-2.66922	0.0101715	-1.76341	0.0209735	probable glucosamine 6-phosphate N-acetyltransferase, transcript variant X1
XP_030023797.1	XP_030023797.1	LOC115442784	-1.07356	0.0693974	-2.67978	0.000905307	-1.87667	0.00277811	dihydropyrimidine dehydrogenase [NADP(+)]
XP_037293308.1;XP_037302159.1	XP_037293308.1	LOC119188986	-0.98621	0.269947	-2.71404	0.0113902	-1.85013	0.0220883	chymotrypsin-1-like
XP_030021474.1	XP_030021474.1	LOC115441040	-1.34952	0.0890841	-2.73732	0.00493907	-2.04342	0.00866588	carnitine O-acetyltransferase
XP_037298571.1	XP_037298571.1	LOC115450123	-1.45062	0.0659888	-2.73911	0.00447658	-2.09486	0.00306209	probable peroxisomal acyl-coenzyme A oxidase 1
XP_030040003.2	XP_030040003.2	LOC115455494	-0.779273	0.354795	-2.77233	0.00775644	-1.7758	0.0221803	collagen alpha-2(I) chain
XP_030029852.1	XP_030029852.1	LOC115447076	-1.22714	0.0746267	-2.79214	0.00195483	-2.00964	0.00269326	glucose dehydrogenase [FAD, quinone]
XP_030030380.1	XP_030030380.1	LOC115447478	-2.35392	0.0765521	-2.86498	0.0364437	-2.60945	0.00643298	UDP-xylose and UDP-N-acetylglucosamine transporter
XP_030038615.2;XP_037302683.1	XP_030038615.2	LOC115454013	-2.33813	0.0877195	-2.88374	0.041429	-2.61093	0.00830335	signal peptidase complex subunit 2
XP_037298781.1	XP_037298781.1	LOC115455337	-0.917139	0.253241	-2.92465	0.00491027	-1.92089	0.0313946	pancreatic lipase-related protein 2-like
XP_030024411.2	XP_030024411.2	LOC115443231	-1.39223	0.0583207	-2.93086	0.00190759	-2.16154	0.00244636	peroxisomal multifunctional enzyme type 2
XP_030028474.1	XP_030028474.1	LOC115446057	-1.14246	0.178063	-2.94703	0.00565785	-2.04475	0.0240199	NAD-dependent protein deacylase sirtuin-5, mitochondrial-like
XP_030035859.1	XP_030035859.1	LOC115451634	-0.452021	0.555542	-2.96547	0.00354537	-1.70874	0.0285973	uncharacterized LOC115451634
XP_030023347.1	XP_030023347.1	LOC115442452	-0.455654	0.564656	-2.96737	0.00378868	-1.71151	0.0301199	carboxypeptidase B
XP_037292966.1	XP_037292966.1	LOC115444176	-0.77979	0.194909	-2.9938	0.000805393	-1.88679	0.0112629	probable 3-hydroxyacyl-CoA dehydrogenase B0272.3, transcript variant X2
XP_037302630.1	XP_037302630.1	LOC119193032	-2.21939	0.0537045	-3.01381	0.014089	-2.6166	0.00540556	retinol dehydrogenase 13-like
XP_030022745.2	XP_030022745.2	LOC115441950	-1.67429	0.0968058	-3.05109	0.00941841	-2.36269	0.00488803	juvenile hormone-binding protein-like
XP_030025295.1	XP_030025295.1	LOC115443851	-1.9878	0.0593596	-3.06256	0.00928648	-2.52518	0.00331564	congested-like trachea protein
XP_030028748.2	XP_030028748.2	LOC115446287	-0.849591	0.252468	-3.09924	0.00239561	-1.97442	0.0108935	fibrillin-1
XP_030037756.1;XP_030037757.1	XP_030037756.1	LOC115453217	-0.465362	0.629111	-3.40384	0.00462373	-1.9346	0.0375395	CLIP domain-containing serine protease 2, transcript variant X2
XP_030024297.1	XP_030024297.1	LOC115443156	-0.526453	0.478418	-3.57069	0.000905307	-2.04857	0.0207297	fungal protease inhibitor-1
XP_037297612.1	XP_037297612.1	LOC115443698	-1.92528	0.0552424	-3.57245	0.00372963	-2.74887	0.00239848	lactase-phlorizin hydrolase
XP_030026964.1;XP_030026965.1	XP_030026964.1	LOC115445032	-1.3341	0.096526	-3.68935	0.000981759	-2.51173	0.00368453	uncharacterized LOC115445032, transcript variant X2
XP_030024847.2	XP_030024847.2	LOC115443539	-2.28245	0.0743103	-3.78186	0.00928648	-3.03215	0.00331564	brachyurin
XP_030032308.1;XP_030032309.1	XP_030032308.1	LOC115448867	-3.13974	0.108198	-4.01907	0.0481213	-3.5794	0.0219074	actin cytoskeleton-regulatory complex protein PAN1
XP_037297972.1	XP_037297972.1	LOC115444577	-2.32621	0.0801379	-4.32845	0.00604412	-3.32733	0.0122461	lactase-phlorizin hydrolase
XP_030021026.2	XP_030021026.2	LOC115440709	-0.478674	0.601773	-4.33773	0.00088723	-2.4082	0.0399259	hemicentin-2
XP_030038349.1	XP_030038349.1	LOC115453766	-1.92302	0.0605392	-4.47232	0.00103671	-3.19767	0.0022208	15-hydroxyprostaglandin dehydrogenase [NAD(+)]
XP_030027683.2;XP_030027684.2;XP_030027685.2;XP_030027686.2;XP_030027687.2;XP_030027688.2;XP_030027689.2;XP_030027690.2;XP_030027691.2;XP_030027692.2;XP_030027693.2;XP_030027694.2	XP_030027683.2	LOC115445527	-1.09128	0.0838154	-4.67152	6.40919e-05	-2.8814	0.0477068	inter alpha-trypsin inhibitor, heavy chain 4, transcript variant X1
XP_037298314.1;XP_037301194.1	XP_037298314.1	LOC119190454	-1.77456	0.103811	-4.71746	0.00160027	-3.24601	0.00676664	lactase-phlorizin hydrolase-like
XP_030039437.2	XP_030039437.2	LOC115454868	-1.28878	0.306853	-5.16697	0.00287298	-3.22788	0.0129613	15-hydroxyprostaglandin dehydrogenase [NAD(+)]
XP_030025072.2	XP_030025072.2	LOC115443697	-2.00733	0.0573796	-6.49282	0.000119883	-4.25008	0.00436632	myrosinase 1
XP_030033285.1	XP_030033285.1	LOC115449570	4.92618	0.0261446	2.2202	0.240195	3.57319	0.0184311	NADH dehydrogenase [ubiquinone] 1 beta subcomplex subunit 2, mitochondrial
XP_030023219.2	XP_030023219.2	LOC115442349	4.41397	0.0129745	2.05277	0.136946	3.23337	0.00718779	hornerin
XP_030029521.2	XP_030029521.2	LOC115446850	3.53858	0.0183447	1.87998	0.125902	2.70928	0.00643298	uncharacterized LOC115446850
XP_030025502.2;XP_037301848.1	XP_030025502.2	LOC115444030	3.28443	0.00635793	1.59015	0.0631018	2.43729	0.00738209	protein unc-13 homolog 4B
XP_030033139.1	XP_030033139.1	LOC115449447	3.26626	0.0167814	1.44165	0.192057	2.35395	0.0133583	H/ACA ribonucleoprotein complex subunit 2-like protein
XP_030033273.1	XP_030033273.1	LOC115449558	3.22851	0.0366667	1.24712	0.362879	2.23781	0.0407482	ATP synthase subunit d, mitochondrial
XP_030038848.1	XP_030038848.1	LOC115454244	3.21074	0.0270454	2.37976	0.0645126	2.79525	0.00421454	protein MAK16 homolog A
XP_037295823.1	XP_037295823.1	LOC115439755	3.20373	0.0375891	1.46392	0.285763	2.33383	0.0299816	myosin regulatory light chain 2
XP_030024718.1;XP_030024720.1	XP_030024718.1	LOC115443453	3.20225	0.0155502	0.929753	0.381429	2.066	0.022302	troponin C, isoallergen Bla g 6.0301, transcript variant X1
XP_030021327.1;XP_030021328.1	XP_030021327.1	LOC115440942	3.08141	0.0275257	1.2097	0.314256	2.14556	0.0344191	myosuppressin, transcript variant X1
XP_037295643.1	XP_037295643.1	LOC115442592	3.03224	0.0405436	1.13828	0.389707	2.08526	0.0453448	MICOS complex subunit MIC10-like
XP_030032794.1;XP_030032795.1;XP_037300649.1	XP_030032794.1	LOC115449204	3.0079	0.0409922	1.1489	0.383996	2.0784	0.0453448	glycerophosphodiester phosphodiesterase GDPD6, transcript variant X2
XP_030025994.2;XP_030025995.2	XP_030025994.2	LOC115444373	2.98624	0.00154995	1.085	0.0545477	2.03562	0.00349241	laminin-like protein epi-1, transcript variant X1
XP_037292682.1;XP_037292683.1	XP_037292682.1	LOC115453722	2.89511	0.00170523	0.782824	0.158256	1.83896	0.0127327	L-asparaginase, transcript variant X1
XP_037301112.1	XP_037301112.1	LOC115449065	2.7994	0.00968724	1.09474	0.157777	1.94707	0.00645106	TOX high mobility group box family member 3
XP_030041229.1	XP_030041229.1	LOC115456350	2.78772	0.0317324	1.79159	0.116184	2.28966	0.00886985	transcription regulator complex subunit bur6
XP_030023264.2;XP_037295367.1;XP_037295368.1;XP_037301136.1	XP_030023264.2	LOC115442379	2.78057	0.0165968	1.11616	0.235574	1.94837	0.016569	UPF0545 protein C22orf39 homolog
XP_037292399.1	XP_037292399.1	LOC115442750	2.77168	0.047435	2.31094	0.0754381	2.54131	0.00738209	uncharacterized PE-PGRS family protein PE_PGRS54, transcript variant X1
XP_037299754.1	XP_037299754.1	LOC119190829	2.72407	0.0165145	1.22551	0.178307	1.97479	0.0094391	uncharacterized LOC119190829
XP_037295836.1;XP_037301629.1;XP_037302175.1	XP_037295836.1	LOC115440266	2.72184	0.00393041	0.689601	0.271048	1.70572	0.037297	NAD kinase 2, mitochondrial
XP_030032016.2	XP_030032016.2	LOC115448656	2.69422	0.0261446	1.57292	0.127725	2.13357	0.00861041	trypsin, alkaline A-like, transcript variant X2
XP_030026218.1;XP_037295742.1	XP_030026218.1	LOC115444542	2.6688	0.0188937	1.84792	0.0574779	2.25836	0.00381192	cysteine dioxygenase, transcript variant X1
XP_030035220.1	XP_030035220.1	LOC115451145	2.65103	0.0123779	1.39814	0.0813898	2.02458	0.00750479	membrane-associated progesterone receptor component 2
XP_037294043.1	XP_037294043.1	LOC119189160	2.61055	0.00393041	1.21329	0.0546444	1.91192	0.00251335	uncharacterized LOC119189160
XP_030024481.1	XP_030024481.1	LOC115443273	2.54761	0.0123779	1.35127	0.0802977	1.94944	0.00548114	zinc finger protein 593 homolog
XP_030024538.2;XP_030024539.2	XP_030024538.2	LOC115443322	2.50161	0.0129745	1.26707	0.107577	1.88434	0.00511054	protein obstructor-E, transcript variant X1
XP_030024803.2	XP_030024803.2	LOC115443508	2.46061	0.0322567	1.95636	0.0601831	2.20848	0.00991623	uncharacterized LOC115443508
XP_030027952.1;XP_030027953.1;XP_030027954.1	XP_030027952.1	LOC115445716	2.35844	0.020638	1.10309	0.188328	1.73077	0.0236419	programmed cell death protein 6, transcript variant X3
XP_030020507.2	XP_030020507.2	LOC115440377	2.35038	0.0153542	1.03248	0.173291	1.69143	0.0111863	heme peroxidase 2
XP_030032452.1	XP_030032452.1	LOC115448953	2.29415	0.0165968	0.753388	0.333639	1.52377	0.020981	apyrase, transcript variant X1
XP_030035609.2	XP_030035609.2	LOC115451432	2.29156	0.0106733	1.0772	0.100728	1.68438	0.00575581	delta-1-pyrroline-5-carboxylate dehydrogenase, mitochondrial
XP_037300053.1;XP_037300939.1;XP_037301657.1	XP_037300053.1	LOC119190890	2.28958	0.0312054	0.744685	0.423192	1.51713	0.0378424	sodium- and chloride-dependent creatine transporter 1-like
XP_030023879.1;XP_030023880.1;XP_030023882.1;XP_030023883.1;XP_030023884.1;XP_030023885.1;XP_030023886.1	XP_030023879.1	LOC115442843	2.27458	0.0155383	1.19585	0.111383	1.73521	0.015911	protein polybromo-1, transcript variant X1
XP_037294534.1;XP_037294616.1;XP_037294650.1;XP_037294684.1	XP_037294534.1	LOC115452845	2.26965	0.0175406	0.966679	0.213749	1.61816	0.0178728	lysosomal alpha-mannosidase, transcript variant X6
XP_037298715.1	XP_037298715.1	LOC115441740	2.26165	0.0479458	1.07507	0.302547	1.66836	0.0330646	pancreatic triacylglycerol lipase
XP_030032752.1	XP_030032752.1	LOC115449159	2.25556	0.0165145	1.55974	0.0511878	1.90765	0.00277691	somatomedin-B and thrombospondin type-1 domain-containing protein
XP_030020657.1	XP_030020657.1	LOC115440475	2.15372	0.0165968	0.967007	0.182932	1.56037	0.0140717	NF-kappa-B inhibitor cactus
XP_037300254.1;XP_037302117.1	XP_037300254.1	LOC115455298	2.10529	0.00545391	0.740267	0.154732	1.42278	0.0184311	U4/U6.U5 tri-snRNP-associated protein 2
XP_030028097.1	XP_030028097.1	LOC115445799	2.09312	0.0165968	1.27199	0.0783528	1.68256	0.00938114	uncharacterized LOC115445799
XP_030037476.2	XP_030037476.2	LOC115452989	2.08921	0.0165145	0.736494	0.294811	1.41285	0.0184311	telomerase Cajal body protein 1 homolog
XP_037298395.1;XP_037298396.1	XP_037298395.1	LOC115453874	2.06017	0.0312277	1.13478	0.169069	1.59747	0.0131134	uncharacterized LOC115453874, transcript variant X2
XP_037294525.1;XP_037302102.1	XP_037294525.1	LOC119189343	2.04959	0.0123779	0.959347	0.12524	1.50447	0.016569	charged multivesicular body protein 2b-like
XP_030020905.2	XP_030020905.2	LOC115440646	2.04206	0.0435286	1.38672	0.127888	1.71439	0.0120585	uncharacterized LOC115440646
XP_030033612.1;XP_030033677.1;XP_030033822.1;XP_037298515.1	XP_030033612.1	LOC115449826	1.99341	0.0155383	1.1079	0.0951443	1.55065	0.0245868	sphingomyelin phosphodiesterase, transcript variant X2
XP_030040582.1;XP_030040735.1;XP_030040813.1;XP_037303495.1	XP_030040582.1	LOC115455894	1.9878	0.0270454	1.09921	0.154732	1.54351	0.0179881	SWI/SNF-related matrix-associated actin-dependent regulator of chromatin subfamily E member 1, transcript variant X4
XP_037296697.1	XP_037296697.1	LOC119189961	1.93647	0.0341218	0.760105	0.344217	1.34829	0.0378424	uncharacterized LOC119189961
XP_030035623.1;XP_037301698.1	XP_030035623.1	LOC115451443	1.83536	0.0155383	1.16723	0.0623058	1.5013	0.0146984	GDP-fucose protein O-fucosyltransferase 2
XP_037297385.1	XP_037297385.1	LOC115450565	1.73263	0.0312054	0.786012	0.258845	1.25932	0.0453448	nuclear inhibitor of protein phosphatase 1
XP_030030136.1	XP_030030136.1	LOC115447275	1.73039	0.0309619	0.692731	0.318624	1.21156	0.0330646	collagen alpha-1(I) chain-like
XP_030039261.1;XP_030039266.1;XP_030039271.1	XP_030039261.1	LOC115454680	1.70957	0.0207644	0.611172	0.319494	1.16037	0.0269979	RNA-binding protein cabeza, transcript variant X1
XP_030020914.1;XP_030020918.1;XP_037296561.1	XP_030020914.1	LOC115440658	1.6731	0.0234213	0.732204	0.236462	1.20265	0.0280066	tropomodulin-1, transcript variant X11
XP_030037274.1	XP_030037274.1	LOC115452808	1.66935	0.0353503	0.786247	0.261069	1.2278	0.0353351	splicing factor 3B subunit 5
XP_030023303.2	XP_030023303.2	LOC115442412	1.62894	0.0405436	1.14293	0.108926	1.38594	0.0104658	carboxypeptidase B
XP_030021959.1;XP_030021967.1	XP_030021959.1	LOC115441335	1.60062	0.0303215	0.778365	0.222466	1.18949	0.0194599	calmodulin, transcript variant X2
XP_037295464.1	XP_037295464.1	LOC115449064	1.59461	0.0478236	0.745302	0.31075	1.16996	0.044149	splicing factor 3B subunit 1
XP_037299886.1;XP_037299887.1;XP_037299888.1	XP_037299886.1	LOC115447460	1.58491	0.0211728	1.10535	0.0630244	1.34513	0.0186207	uncharacterized LOC115447460, transcript variant X3
XP_037292716.1;XP_037292717.1;XP_037292718.1;XP_037292719.1;XP_037299923.1	XP_037292716.1	LOC115446040	1.58469	0.047435	0.680258	0.351319	1.13247	0.0417101	neurocalcin homolog, transcript variant X4
XP_030031828.1	XP_030031828.1	LOC115448519	1.54442	0.040663	1.37301	0.0527258	1.45871	0.0262385	uncharacterized LOC115448519
XP_030031110.1	XP_030031110.1	LOC115447945	1.49983	0.0165968	1.03305	0.0527258	1.26644	0.00464392	digestive cysteine proteinase 1
XP_030034606.1	XP_030034606.1	LOC115450676	1.4971	0.0175774	0.622829	0.225348	1.05997	0.0220186	pre-mRNA-processing factor 19
XP_030029119.1;XP_030029121.1	XP_030029119.1	LOC115446561	1.47696	0.0435865	1.17214	0.080395	1.32455	0.00886985	complement component 1 Q subcomponent-binding protein, mitochondrial, transcript variant X1
XP_030033168.1	XP_030033168.1	LOC115449472	1.46925	0.0349669	1.12837	0.072066	1.29881	0.0187113	epimerase family protein SDR39U1
XP_037299602.1	XP_037299602.1	LOC115455326	1.42194	0.0261446	0.623556	0.25098	1.02275	0.0220659	27 kDa hemolymph glycoprotein-like
XP_037292452.1;XP_037301509.1	XP_037292452.1	LOC115442747	1.37245	0.047435	1.24521	0.0575727	1.30883	0.00875999	uncharacterized LOC115442747
XP_030030239.1	XP_030030239.1	LOC115447353	1.32629	0.0423773	1.07219	0.0729122	1.19924	0.00834948	ATP synthase subunit alpha, mitochondrial
XP_030025647.2;XP_030025648.2	XP_030025647.2	LOC115444127	1.29967	0.0299305	0.544753	0.293885	0.92221	0.027977	nuclear pore glycoprotein p62, transcript variant X2
XP_037294039.1;XP_037294040.1;XP_037294041.1;XP_037294042.1	XP_037294039.1	LOC115449332	1.188	0.0435865	0.60317	0.255848	0.895586	0.0422274	RNA-binding protein lark, transcript variant X2
XP_030024468.1;XP_037301435.1	XP_030024468.1	LOC115443265	1.14775	0.0461573	0.625114	0.229099	0.886431	0.0280066	ran-specific GTPase-activating protein
XP_030036319.2	XP_030036319.2	LOC115452023	-1.13074	0.0480739	-1.08116	0.0504162	-1.10595	0.00980528	39S ribosomal protein L19, mitochondrial
XP_030022292.1	XP_030022292.1	LOC115441586	-1.36705	0.0261446	-0.782339	0.136418	-1.0747	0.0119599	histidine triad nucleotide-binding protein 1
XP_030034207.2;XP_030034208.2	XP_030034207.2	LOC115450351	-1.37778	0.0187546	-0.673876	0.160423	-1.02583	0.0184311	protein lifeguard 1, transcript variant X1
XP_037297247.1	XP_037297247.1	LOC119190147	-1.39113	0.0317983	-0.753307	0.180684	-1.07222	0.0184311	synaptobrevin-1-like
XP_037298970.1	XP_037298970.1	LOC115452428	-1.51817	0.018336	-0.471565	0.370194	-0.994867	0.0282005	spermine synthase
XP_030020010.1	XP_030020010.1	LOC115440026	-1.52212	0.0261446	-1.1044	0.0653094	-1.31326	0.00617232	ethanolamine-phosphate cytidylyltransferase
XP_030023794.2	XP_030023794.2	LOC115442779	-1.53068	0.0312277	-1.24008	0.0553735	-1.38538	0.00560953	uncharacterized LOC115442779
XP_030028910.1	XP_030028910.1	LOC115446397	-1.53986	0.0255925	-0.907652	0.121819	-1.22376	0.00980528	protein dj-1beta
XP_030041352.1	XP_030041352.1	LOC115456430	-1.5408	0.0353503	-1.29179	0.0557998	-1.4163	0.0353559	trypsin beta-like
XP_030028039.1;XP_030028047.1;XP_037296564.1;XP_037296565.1;XP_037296567.1	XP_030028039.1	LOC115445763	-1.55184	0.0370139	-1.10234	0.0986781	-1.32709	0.00956198	L-xylulose reductase-like, transcript variant X3
XP_030036028.1	XP_030036028.1	LOC115451795	-1.62871	0.047435	-1.04236	0.160954	-1.33553	0.0178468	membrane-associated progesterone receptor component 1
XP_030041095.1	XP_030041095.1	LOC115456248	-1.6578	0.0165968	-1.12889	0.0548782	-1.39334	0.00349241	sphingolipid delta(4)-desaturase DES1
XP_030028056.1;XP_030028057.1	XP_030028056.1	LOC115445774	-1.74198	0.0237083	-1.24033	0.0645126	-1.49115	0.00464392	dnaJ homolog subfamily C member 5, transcript variant X1
XP_037296258.1	XP_037296258.1	LOC119189779	-1.84431	0.0123779	-0.812642	0.145046	-1.32848	0.012553	short/branched chain specific acyl-CoA dehydrogenase, mitochondrial-like
XP_030025989.1	XP_030025989.1	LOC115444370	-1.86079	0.049119	-1.32382	0.127888	-1.5923	0.013926	voltage-dependent anion-selective channel, transcript variant X1
XP_030027728.1	XP_030027728.1	LOC115445551	-1.95175	0.0129745	-0.473354	0.444206	-1.21255	0.0302603	transmembrane protein 256 homolog
XP_030039506.1	XP_030039506.1	LOC115454949	-2.04904	0.0204633	-1.04226	0.154132	-1.54565	0.00933273	ADP,ATP carrier protein
XP_030020681.1	XP_030020681.1	LOC115440487	-2.05373	0.0332254	-1.50548	0.0796527	-1.7796	0.00698864	glutathione S-transferase 1-like
XP_030023642.2;XP_030023643.2	XP_030023642.2	LOC115442664	-2.10296	0.047435	-1.5956	0.101371	-1.84928	0.0194599	vacuole membrane protein 1, transcript variant X1
XP_030035666.1	XP_030035666.1	LOC115451465	-2.26092	0.0312277	-1.60221	0.0842515	-1.93156	0.00643298	39S ribosomal protein L21, mitochondrial
XP_030022860.2	XP_030022860.2	LOC115442043	-2.36662	0.0206117	-1.58997	0.0676267	-1.9783	0.00570628	short/branched chain specific acyl-CoA dehydrogenase, mitochondrial, transcript variant X2
XP_030021973.1	XP_030021973.1	LOC115441351	-2.40267	0.0148799	-1.56921	0.0531026	-1.98594	0.00595905	transmembrane emp24 domain-containing protein 2
XP_037295656.1	XP_037295656.1	LOC115443087	-2.45013	0.0155383	-0.837643	0.300041	-1.64389	0.0220186	SEC14-like protein 2
XP_030033568.1	XP_030033568.1	LOC115449815	-2.51326	0.0165045	-0.869863	0.300569	-1.69156	0.020981	fatty acid-binding protein 1-like
XP_030031300.1	XP_030031300.1	LOC115448124	-2.51514	0.0207644	-1.3172	0.145821	-1.91617	0.0185681	maltase A1
XP_037300251.1	XP_037300251.1	LOC115448797	-2.66971	0.0353503	-1.99298	0.0803837	-2.33134	0.00643298	aspartate aminotransferase, cytoplasmic
XP_030032594.1;XP_030032602.1;XP_030032609.1;XP_030032617.1;XP_030032624.1;XP_030032632.1	XP_030032594.1	LOC115449042	-2.73514	0.0123779	-1.00326	0.219399	-1.8692	0.0153387	zinc transporter 2, transcript variant X3
XP_030022540.2	XP_030022540.2	LOC115441778	-2.99139	0.0292425	-1.99476	0.0951443	-2.49307	0.00643298	non-specific lipid-transfer protein
XP_037298974.1;XP_037302887.1	XP_037298974.1	LOC115449315	-3.05384	0.0207644	-1.49221	0.171661	-2.27303	0.0453448	V-type proton ATPase subunit S1
XP_030038979.1;XP_030038984.1	XP_030038979.1	LOC115454377	-3.29322	0.0261446	-1.27861	0.309767	-2.28592	0.0313946	polymerase delta-interacting protein 3, transcript variant X2
XP_030025222.1	XP_030025222.1	LOC115443796	-3.32764	0.0123779	-1.81162	0.0724763	-2.56963	0.00305173	mitochondrial carrier homolog 2
XP_030035152.2	XP_030035152.2	LOC115451090	-3.39535	0.00392967	-0.662675	0.392091	-2.02901	0.0299816	cytochrome P450 6B5
XP_030025788.1	XP_030025788.1	LOC115444234	-3.4065	0.0360382	-1.47614	0.303315	-2.44132	0.0364968	ribonuclease kappa
XP_037292694.1	XP_037292694.1	LOC115454143	-3.40809	0.0296401	-1.44686	0.286669	-2.42747	0.0311515	adenosine deaminase 2
XP_037299091.1;XP_037299092.1;XP_037299093.1;XP_037299094.1	XP_037299091.1	LOC115450399	-3.58941	0.0283246	-2.22744	0.116148	-2.90843	0.026293	dynactin subunit 1, transcript variant X1
XP_037299109.1	XP_037299109.1	LOC115453823	-3.73697	0.00233548	-1.36316	0.0845763	-2.55006	0.00524989	phosphate carrier protein, mitochondrial
XP_037296330.1	XP_037296330.1	LOC119189806	-3.85323	0.0129745	-0.69355	0.586174	-2.27339	0.0374181	glutarate-semialdehyde dehydrogenase
XP_030023288.2	XP_030023288.2	LOC115442398	-4.00533	0.0483997	-3.57098	0.063096	-3.78816	0.0187113	3-oxoacyl-[acyl-carrier-protein] reductase FabG-like
XP_030040373.2	XP_030040373.2	LOC115455792	-4.33538	0.0353503	-2.58786	0.154006	-3.46162	0.0196098	arylphorin subunit beta-like
XP_030036602.2	XP_030036602.2	LOC115452268	-4.34419	0.0409922	-3.92545	0.0502025	-4.13482	0.00775899	4-coumarate--CoA ligase 1-like
XP_030027362.1	XP_030027362.1	LOC115445285	-4.4983	0.0133297	-1.8454	0.189182	-3.17185	0.00913739	15-hydroxyprostaglandin dehydrogenase [NAD(+)]
XP_030038446.1	XP_030038446.1	LOC115453857	-5.5584	0.0187198	-2.76316	0.154305	-4.16078	0.009254	V-type proton ATPase 21 kDa proteolipid subunit
XP_030030997.1	XP_030030997.1	LOC115447877	-2.72705	0.0152254	3.82224	0.00184166	0.547597	0.767085	replication protein A 70 kDa DNA-binding subunit
XP_030019545.1;XP_037302112.1	XP_030019545.1	LOC115439723	-1.76843	0.049119	1.90893	0.0325993	0.0702473	0.954991	nucleolar GTP-binding protein 1
XP_037301714.1	XP_037301714.1	LOC119191963	1.55477	0.0292425	-1.59497	0.019533	-0.0201026	0.986781	trypsin, alkaline A
XP_037295675.1;XP_037295676.1;XP_037295677.1;XP_037295678.1;XP_037295679.1	XP_037295675.1	LOC115443078	1.23089	0.0425693	-1.88819	0.0055973	-0.32865	0.696509	serine/arginine repetitive matrix protein 2, transcript variant X1
XP_030026399.1	XP_030026399.1	LOC115444672	3.52531	0.0695105	1.95326	0.291312	2.73928	0.0471856	endocuticle structural glycoprotein SgAbd-8
XP_030023417.1	XP_030023417.1	LOC115442513	2.90961	0.118246	2.21982	0.225837	2.56472	0.0453448	endocuticle structural glycoprotein ABD-5
XP_030034481.1;XP_030034482.1	XP_030034481.1	LOC115450563	1.92242	0.112335	2.44247	0.0514078	2.18245	0.0211909	O-acyltransferase like protein, transcript variant X2
XP_030028604.1	XP_030028604.1	LOC115446177	1.95216	0.121907	2.20549	0.0811071	2.07883	0.0194599	THO complex subunit 7 homolog
XP_030022375.1;XP_030022376.1;XP_030022377.1;XP_030022378.1;XP_030022379.1	XP_030022375.1	LOC115441655	2.24814	0.0659888	1.80617	0.12018	2.02716	0.0182785	metaxin-2, transcript variant X5
XP_030021270.2;XP_030021271.2;XP_030021272.2;XP_030021273.2;XP_030021275.2	XP_030021270.2	LOC115440910	1.85673	0.134412	2.17326	0.0833211	2.015	0.0215707	LIM domain only protein 7, transcript variant X1
XP_037295209.1;XP_037301732.1;XP_037301733.1;XP_037301734.1;XP_037301735.1	XP_037295209.1	LOC115451803	1.57273	0.155586	2.10093	0.0656117	1.83683	0.0217134	uncharacterized LOC115451803
XP_037299261.1	XP_037299261.1	LOC115455128	2.25829	0.0569096	1.27103	0.249757	1.76466	0.0285973	H/ACA ribonucleoprotein complex subunit 4
XP_030032391.1	XP_030032391.1	LOC115448908	2.29705	0.0611571	1.20771	0.296097	1.75238	0.0378424	uncharacterized LOC115448908
XP_030032050.1	XP_030032050.1	LOC115448680	1.96483	0.0935241	1.29676	0.258372	1.63079	0.0467985	NADH-ubiquinone oxidoreductase subunit 8
XP_030037219.1	XP_030037219.1	LOC115452759	1.53024	0.133275	1.73129	0.0922885	1.63077	0.0330646	zinc metalloproteinase nas-4
XP_037296607.1	XP_037296607.1	LOC115456433	1.96758	0.0578005	1.18723	0.218412	1.5774	0.0407598	sorbin and SH3 domain-containing protein 1
XP_030033676.2	XP_030033676.2	LOC115449926	1.48073	0.118246	1.56502	0.0974924	1.52287	0.026235	pancreatic triacylglycerol lipase
XP_037301457.1	XP_037301457.1	LOC119191675	1.68958	0.0727505	1.32969	0.139737	1.50963	0.0238616	zinc metalloproteinase nas-4-like
XP_030032739.1	XP_030032739.1	LOC115449149	1.67596	0.0999658	1.21302	0.224377	1.44449	0.0422274	uncharacterized LOC115449149
XP_030024900.1;XP_037293670.1	XP_030024900.1	LOC115443584	1.45664	0.125791	1.41304	0.13489	1.43484	0.0304562	splicing factor U2AF 50 kDa subunit, transcript variant X2
XP_030020355.1;XP_030020356.1;XP_030020357.1;XP_030020358.1;XP_030020359.1	XP_030020355.1	LOC115440271	1.79825	0.0700993	1.04733	0.266308	1.42279	0.0455542	PC4 and SFRS1-interacting protein, transcript variant X3
XP_030028742.2	XP_030028742.2	LOC115446281	1.58222	0.0513982	1.24374	0.100826	1.41298	0.018595	angiotensin-converting enzyme
XP_030035455.1	XP_030035455.1	LOC115451308	1.40965	0.0838277	1.01902	0.195761	1.21434	0.0330646	c-Myc-binding protein
XP_030029541.1	XP_030029541.1	LOC115446873	1.26997	0.113819	1.13913	0.150133	1.20455	0.0406934	uncharacterized LOC115446873
XP_037300528.1	XP_037300528.1	LOC115454002	1.6469	0.051106	0.760372	0.330909	1.20364	0.0477068	NADH dehydrogenase [ubiquinone] 1 beta subcomplex subunit 8, mitochondrial
XP_030020215.2	XP_030020215.2	LOC115440163	1.18953	0.16839	1.2133	0.161474	1.20141	0.0477068	neuropeptide F, transcript variant X1
XP_037292364.1	XP_037292364.1	LOC115451168	1.31929	0.0537045	1.03316	0.106645	1.17622	0.0211962	tropomyosin-2, transcript variant X15
XP_037300500.1	XP_037300500.1	LOC115455213	1.36119	0.0635936	0.966687	0.161514	1.16394	0.045352	prion-like-(Q/N-rich) domain-bearing protein 25
XP_030023428.1	XP_030023428.1	LOC115442519	1.29747	0.0578005	1.00428	0.117474	1.15088	0.0165864	NADH dehydrogenase [ubiquinone] 1 beta subcomplex subunit 7
XP_030027547.1	XP_030027547.1	LOC115445424	1.44072	0.062294	0.845468	0.246764	1.14309	0.0420836	uncharacterized LOC115445424
XP_030026913.1	XP_030026913.1	LOC115445016	1.10194	0.0777399	1.07841	0.0778892	1.09017	0.0172429	uncharacterized LOC115445016
XP_037300900.1	XP_037300900.1	LOC115452519	1.00285	0.103177	1.1579	0.0631875	1.08037	0.0223848	polymerase delta-interacting protein 2
XP_030040249.2;XP_037298481.1	XP_030040249.2	LOC115455715	1.10028	0.0875502	1.04263	0.0991945	1.07146	0.0217134	CD2 antigen cytoplasmic tail-binding protein 2 homolog, transcript variant X2
XP_037300717.1	XP_037300717.1	LOC115445762	0.980699	0.115355	1.07652	0.0833211	1.02861	0.0220883	antichymotrypsin-2, transcript variant X4
XP_030037223.2	XP_030037223.2	LOC115452763	1.17376	0.0663486	0.85739	0.157403	1.01557	0.0403639	deoxynucleotidyltransferase terminal-interacting protein 2
XP_037295201.1;XP_037295202.1;XP_037295203.1;XP_037295204.1	XP_037295201.1	LOC115452302	1.07334	0.0536816	0.838153	0.106645	0.955745	0.0407648	optineurin, transcript variant X3
XP_030035926.2;XP_037300449.1	XP_030035926.2	LOC115451694	0.889963	0.15969	1.01696	0.111575	0.953462	0.0406705	iron-sulfur protein NUBPL
XP_030023300.1	XP_030023300.1	LOC115442407	0.849176	0.128637	1.02922	0.0704046	0.939199	0.0283648	60S acidic ribosomal protein P2
XP_030031104.1	XP_030031104.1	LOC115447939	1.17162	0.0554669	0.697428	0.218412	0.934523	0.0410726	protein obstructor-E, transcript variant X2
XP_037295092.1	XP_037295092.1	LOC115446192	0.89146	0.0867086	0.974114	0.0623058	0.932787	0.0200694	neuroplastin
XP_037295541.1	XP_037295541.1	LOC115449632	0.71674	0.252699	1.12949	0.0816097	0.923114	0.0481011	apolipophorins-like, transcript variant X1
XP_030020223.1	XP_030020223.1	LOC115440169	0.818873	0.117737	0.982463	0.0645882	0.900668	0.0225405	natterin-3
XP_030035381.2	XP_030035381.2	LOC115451270	1.06971	0.0711226	0.633811	0.261283	0.85176	0.0452018	pre-rRNA-processing protein TSR1 homolog
XP_030021616.1	XP_030021616.1	LOC115441134	0.956324	0.0765521	0.722298	0.161428	0.839311	0.0449424	succinyl-CoA:3-ketoacid coenzyme A transferase 1, mitochondrial
XP_030035039.1	XP_030035039.1	LOC115450994	0.861439	0.0965629	0.792577	0.12018	0.827008	0.0440375	putative pre-mRNA-splicing factor ATP-dependent RNA helicase PRP1
XP_030024834.1	XP_030024834.1	LOC115443532	0.873266	0.0802676	0.610314	0.203745	0.74179	0.0467985	myc box-dependent-interacting protein 1, transcript variant X3
XP_037298400.1	XP_037298400.1	LOC115443055	-0.734405	0.098353	-0.605059	0.162834	-0.669732	0.0422274	UBX domain-containing protein 1-B
XP_030025373.1	XP_030025373.1	LOC115443909	-0.558958	0.206353	-0.830034	0.0704858	-0.694496	0.0420836	aldehyde dehydrogenase X, mitochondrial
XP_030034291.2	XP_030034291.2	LOC115450417	-0.840634	0.115012	-0.784933	0.135293	-0.812783	0.0353529	4,5-DOPA dioxygenase extradiol
XP_030030212.1	XP_030030212.1	LOC115447330	-0.757253	0.139987	-1.03181	0.0549042	-0.894533	0.0301009	proteasome assembly chaperone 2
XP_037303242.1	XP_037303242.1	LOC119193723	-1.01339	0.125458	-0.881164	0.175736	-0.947277	0.0477068	alpha-2-macroglobulin receptor-associated protein-like
XP_037298829.1	XP_037298829.1	LOC115450129	-0.83274	0.209314	-1.09158	0.107229	-0.962158	0.0453448	translation initiation factor eIF-2B subunit delta
XP_030033284.1	XP_030033284.1	LOC115449569	-0.947387	0.12282	-1.00518	0.100728	-0.976286	0.0453448	retinal dehydrogenase 1
XP_030023289.2	XP_030023289.2	LOC115442399	-0.965984	0.0801107	-1.01104	0.0651088	-0.988511	0.0184311	3-oxoacyl-[acyl-carrier-protein] reductase FabG-like
XP_030030681.1	XP_030030681.1	LOC115447651	-0.922247	0.095019	-1.05479	0.0601831	-0.988517	0.0186207	integrin alpha-PS1, transcript variant X2
XP_030022520.2	XP_030022520.2	LOC115441760	-0.84987	0.134832	-1.1292	0.0566538	-0.989533	0.0255878	acetyl-CoA acetyltransferase B, mitochondrial
XP_030024703.1;XP_030024705.1	XP_030024703.1	LOC115443446	-0.806532	0.215563	-1.2453	0.0664627	-1.02592	0.0413097	synaptosomal-associated protein 25, transcript variant X3
XP_030021395.1;XP_030021396.1;XP_030021397.1;XP_037297656.1;XP_037297658.1;XP_037297659.1	XP_030021395.1	LOC115440987	-1.00275	0.0788502	-1.11318	0.0533654	-1.05796	0.0309792	sodium/hydrogen exchanger 9B2, transcript variant X7
XP_030033361.2	XP_030033361.2	LOC115449538	-1.06901	0.0611571	-1.0789	0.0555041	-1.07396	0.0165864	long-chain-fatty-acid--CoA ligase ACSBG2, transcript variant X4
XP_030028052.2;XP_030028054.2;XP_037300529.1	XP_030028052.2	LOC115445772	-1.31769	0.0611571	-0.867567	0.187546	-1.09263	0.0344191	S-formylglutathione hydrolase, transcript variant X1
XP_037302819.1	XP_037302819.1	LOC115453707	-1.32976	0.0591108	-0.920176	0.161428	-1.12497	0.0441671	ATP-binding cassette sub-family F member 1
XP_030030832.1	XP_030030832.1	LOC115447760	-1.48367	0.0572304	-0.860859	0.234923	-1.17226	0.0330646	28S ribosomal protein S9, mitochondrial
XP_037303607.1	XP_037303607.1	LOC115453646	-0.874065	0.241716	-1.51595	0.0555873	-1.19501	0.0333848	xaa-Pro aminopeptidase ApepP
XP_030025176.1;XP_037298609.1;XP_037298610.1	XP_030025176.1	LOC115443762	-1.38892	0.0749594	-1.15572	0.122828	-1.27232	0.019842	low molecular weight phosphotyrosine protein phosphatase, transcript variant X1
XP_030032721.2	XP_030032721.2	LOC115449136	-1.29835	0.0687665	-1.25748	0.0703609	-1.27792	0.0124083	membrane alanyl aminopeptidase
XP_030029496.1;XP_030029497.1;XP_030029498.1;XP_030029499.1;XP_030036538.1;XP_030036539.1;XP_030036540.1	XP_030029496.1	LOC115446836	-1.32597	0.0982651	-1.2552	0.112583	-1.29059	0.0221803	ectonucleoside triphosphate diphosphohydrolase 5, transcript variant X1
XP_030033096.1	XP_030033096.1	LOC115449420	-1.02655	0.19121	-1.59844	0.0548109	-1.3125	0.0422274	transcription elongation factor S-II
XP_030039032.1	XP_030039032.1	LOC115454433	-1.18899	0.114166	-1.53224	0.0501369	-1.36061	0.0215705	tRNA-dihydrouridine(16/17) synthase [NAD(P)(+)]-like
XP_037299554.1	XP_037299554.1	LOC119188335	-1.38302	0.0536224	-1.34627	0.0533654	-1.36464	0.00738209	39S ribosomal protein L20, mitochondrial-like
XP_030041063.1;XP_030041147.1	XP_030041063.1	LOC115456203	-1.92454	0.0558159	-0.850154	0.364032	-1.38735	0.0455542	zinc finger CCCH domain-containing protein 11B, transcript variant X1
XP_030024223.2	XP_030024223.2	LOC115443098	-1.53038	0.0798049	-1.27219	0.13084	-1.40129	0.0245549	28S ribosomal protein S22, mitochondrial
XP_037292827.1	XP_037292827.1	LOC115449524	-1.19853	0.224912	-1.68015	0.0968776	-1.43934	0.0420836	phosphatidylethanolamine-binding protein homolog F40A3.3
XP_030023340.1;XP_037303590.1	XP_030023340.1	LOC115442446	-1.38423	0.13547	-1.60825	0.0869379	-1.49624	0.0364927	ubiquitin-fold modifier 1, transcript variant X2
XP_030035250.1	XP_030035250.1	LOC115451168	-1.19321	0.2435	-2.00604	0.0623058	-1.59963	0.0455542	tropomyosin-2, transcript variant X15
XP_030027324.1	XP_030027324.1	LOC115445249	-1.76929	0.0584934	-1.44103	0.101879	-1.60516	0.0155639	venom carboxylesterase-6
XP_030032724.2	XP_030032724.2	LOC115449138	-1.7215	0.0785711	-1.53046	0.106754	-1.62598	0.0221127	membrane alanyl aminopeptidase
XP_030033364.1	XP_030033364.1	LOC115449638	-1.33741	0.158729	-1.96516	0.0501392	-1.65129	0.0199826	mitochondrial import receptor subunit TOM40 homolog 1
XP_030037447.2	XP_030037447.2	LOC115452961	-1.49181	0.13618	-1.84089	0.0724688	-1.66635	0.0333983	brachyurin
XP_037303204.1	XP_037303204.1	LOC115451882	-2.15598	0.0568805	-1.23481	0.240195	-1.69539	0.0421811	sodium-dependent nutrient amino acid transporter 1
XP_037300232.1	XP_037300232.1	LOC115445781	-1.6401	0.127271	-1.76073	0.101879	-1.70041	0.0279233	zinc finger protein 622
XP_030036967.1;XP_030036968.1	XP_030036967.1	LOC115452549	-1.62335	0.095019	-1.78915	0.0676267	-1.70625	0.0142197	60S ribosomal protein L21-like, transcript variant X1
XP_030035513.2;XP_030035514.2	XP_030035513.2	LOC115451366	-2.0942	0.0505863	-1.34646	0.169769	-1.72033	0.0409145	fatty acid synthase, transcript variant X1
XP_030030898.2;XP_030030974.2;XP_030031061.2;XP_037298516.1;XP_037298517.1	XP_030030898.2	LOC115447774	-1.76017	0.0608396	-1.74985	0.0568861	-1.75501	0.0127327	ATP-dependent 6-phosphofructokinase, transcript variant X5
XP_030020438.2	XP_030020438.2	LOC115440331	-2.00461	0.0537045	-1.50573	0.120062	-1.75517	0.0133583	succinate dehydrogenase cytochrome b560 subunit, mitochondrial
XP_030029755.1	XP_030029755.1	LOC115447006	-1.81557	0.0906505	-1.99188	0.0649868	-1.90372	0.0189463	stromal cell-derived factor 2
XP_030034508.1	XP_030034508.1	LOC115450591	-2.06018	0.0621577	-1.89132	0.0756703	-1.97575	0.0129613	uncharacterized LOC115450591
XP_037303326.1	XP_037303326.1	LOC115447301	-1.79548	0.137187	-2.27576	0.0671615	-2.03562	0.020981	pseudouridine-5'-phosphatase
XP_030025011.1;XP_030025020.1;XP_030025028.1;XP_030025037.1;XP_030025047.1;XP_030025055.1	XP_030025011.1	LOC115443662	-2.19154	0.0711226	-2.10463	0.0751647	-2.14808	0.0211909	long-chain-fatty-acid--CoA ligase 4, transcript variant X5
XP_030033174.1	XP_030033174.1	LOC115449475	-2.65011	0.0618859	-1.67021	0.212128	-2.16016	0.0441671	acyl-protein thioesterase 1
XP_030022030.1	XP_030022030.1	LOC115441388	-2.09384	0.0750622	-2.23459	0.0568861	-2.16421	0.00933273	60S ribosomal protein L28
XP_030036697.2	XP_030036697.2	LOC115452336	-2.66496	0.0766548	-1.89326	0.187546	-2.27911	0.0302603	probable 4-coumarate--CoA ligase 1
XP_030032499.1	XP_030032499.1	LOC115448990	-2.80862	0.0591603	-1.9729	0.15709	-2.39076	0.0247506	uncharacterized LOC115448990
XP_030019765.1	XP_030019765.1	LOC115439865	-3.00571	0.0537045	-1.99368	0.164807	-2.4997	0.0209735	von Willebrand factor A domain-containing protein 8
XP_037293160.1	XP_037293160.1	LOC119188951	-4.19934	0.106345	-3.96011	0.122441	-4.07972	0.0221803	non-specific lipid-transfer protein-like
XP_030035812.1	XP_030035812.1	LOC115451595	-3.76287	0.0711821	4.85044	0.0256292	0.543782	0.836069	maltase A1, transcript variant X1
XP_037303627.1	XP_037303627.1	LOC115447744	-0.0604888	0.967407	4.35577	0.00372963	2.14764	0.0799985	uncharacterized LOC115447744, transcript variant X1
XP_037298909.1;XP_037298910.1;XP_037298911.1;XP_037298912.1;XP_037298913.1;XP_037298914.1	XP_037298909.1	LOC115454611	-0.97791	0.422255	3.42663	0.0156311	1.22436	0.327924	pantothenate kinase 3, transcript variant X1
XP_030027612.1	XP_030027612.1	LOC115445469	-0.302489	0.86583	3.37634	0.0363525	1.53692	0.221533	cyclin-dependent kinase 10
XP_030032261.2	XP_030032261.2	LOC115448823	0.58715	0.568981	3.32241	0.00735097	1.95478	0.0584936	ovalbumin-related protein X-like
XP_030032643.2;XP_037294813.1	XP_030032643.2	LOC115449078	-0.755771	0.42744	3.25601	0.00610166	1.25012	0.277247	heat shock protein 83
XP_030027704.2	XP_030027704.2	LOC115445535	-0.171274	0.906293	3.17585	0.0200978	1.50229	0.394092	esterase FE4
XP_030040163.2	XP_030040163.2	LOC115455651	-0.681744	0.541463	3.10128	0.0150488	1.20977	0.283333	collagenase
XP_030028398.1	XP_030028398.1	LOC115446002	-0.917263	0.28895	3.049	0.00565785	1.06587	0.349076	thioredoxin reductase-like selenoprotein T homolog CG3887
XP_030041059.2	XP_030041059.2	LOC115456230	-1.54659	0.0960623	3.04536	0.00618194	0.749384	0.540671	leucine-rich repeat neuronal protein 3-like
XP_030029470.2	XP_030029470.2	LOC115446810	-0.589484	0.59954	3.03204	0.015654	1.22128	0.287023	insecticyanin-B-like
XP_030028518.1	XP_030028518.1	LOC115446098	-0.182124	0.896244	2.90482	0.026232	1.36135	0.190823	actin, muscle-like
XP_030025010.1	XP_030025010.1	LOC115443665	0.296591	0.762706	2.82653	0.00881461	1.56156	0.0865363	uridine 5'-monophosphate synthase
XP_037296360.1	XP_037296360.1	LOC119189820	-0.176738	0.877246	2.79689	0.0113902	1.31007	0.157243	uncharacterized LOC119189820
XP_030026731.1;XP_030026732.1;XP_030026733.1;XP_030026734.1	XP_030026731.1	LOC115444897	-1.39759	0.15994	2.77873	0.0150448	0.690571	0.569066	dipeptidyl peptidase 3, transcript variant X4
XP_030037956.2;XP_037301346.1;XP_037301524.1	XP_030037956.2	LOC115453399	-0.301301	0.761778	2.75131	0.0106193	1.225	0.268548	protein arginine N-methyltransferase 1
XP_030028520.1	XP_030028520.1	LOC115446101	-0.476602	0.683837	2.74321	0.0247792	1.1333	0.306783	adenine phosphoribosyltransferase
XP_030033314.2;XP_037293460.1;XP_037293461.1;XP_037303224.1	XP_030033314.2	LOC115449593	0.740866	0.533466	2.69773	0.0354445	1.7193	0.0667545	CD209 antigen, transcript variant X2
XP_037300151.1	XP_037300151.1	LOC115445077	-0.463351	0.533466	2.64632	0.00491503	1.09148	0.275358	glutamate--cysteine ligase catalytic subunit
XP_037301331.1	XP_037301331.1	LOC119191545	0.0540726	0.961828	2.63678	0.0109181	1.34543	0.159109	ATP-dependent RNA helicase WM6
XP_030030583.2	XP_030030583.2	LOC115447579	0.200936	0.833516	2.62523	0.00881461	1.41308	0.0949735	UDP-glucose 4-epimerase
XP_030031432.1	XP_030031432.1	LOC115448218	-0.173591	0.841189	2.59015	0.00565785	1.20828	0.199186	proliferation-associated protein 2G4
XP_037294972.1;XP_037294974.1;XP_037294975.1;XP_037294976.1	XP_037294972.1	LOC115448860	-0.110432	0.8791	2.53298	0.00208886	1.21127	0.103322	uncharacterized LOC115448860, transcript variant X3
XP_037301127.1	XP_037301127.1	LOC119191328	-1.42989	0.19451	2.5295	0.0355977	0.549806	0.650402	uncharacterized LOC119191328
XP_037296365.1;XP_037296366.1	XP_037296365.1	LOC115440338	-0.760925	0.265679	2.52599	0.00463632	0.882532	0.313066	uncharacterized LOC115440338, transcript variant X2
XP_037293663.1;XP_037301675.1	XP_037293663.1	LOC115455369	0.299318	0.705282	2.50382	0.00610166	1.40157	0.0589399	actin-5C
XP_030021244.1	XP_030021244.1	LOC115440885	0.168547	0.868491	2.4822	0.0118021	1.32537	0.0975543	phosphatidylinositol 5-phosphate 4-kinase type-2 alpha
XP_037292309.1;XP_037292312.1;XP_037292314.1;XP_037292316.1;XP_037292318.1;XP_037292320.1	XP_037292309.1	LOC115451759	-1.21928	0.216708	2.42033	0.0263651	0.600522	0.576046	signal transducer and activator of transcription 5B, transcript variant X2
XP_030035429.1;XP_030035430.1	XP_030035429.1	LOC115451290	-0.487523	0.467808	2.41914	0.00491503	0.965806	0.287023	lysine--tRNA ligase, transcript variant X1
XP_030026294.1	XP_030026294.1	LOC115444599	-0.282342	0.810493	2.39938	0.0339458	1.05852	0.246451	epoxide hydrolase 4
XP_030025927.1;XP_030025928.1;XP_030025929.1;XP_030025930.1	XP_030025927.1	LOC115444329	-0.181737	0.877246	2.38664	0.0243196	1.10245	0.214294	UTP--glucose-1-phosphate uridylyltransferase, transcript variant X1
XP_030023189.2	XP_030023189.2	LOC115442325	0.303622	0.705282	2.36562	0.00881461	1.33462	0.071376	mitogen-activated protein kinase 1
XP_030030485.1;XP_030030487.1	XP_030030485.1	LOC115447521	-0.770629	0.454302	2.35113	0.0366765	0.790249	0.454367	cyclin-G-associated kinase, transcript variant X2
XP_030035097.1;XP_037292335.1	XP_030035097.1	LOC115451043	-0.01155	0.989067	2.35013	0.00290852	1.16929	0.307692	importin-11, transcript variant X2
XP_030041318.1;XP_037296513.1;XP_037296514.1	XP_030041318.1	LOC115456409	0.557976	0.540749	2.33823	0.0204823	1.4481	0.0971372	acidic leucine-rich nuclear phosphoprotein 32 family member A, transcript variant X3
XP_030023900.1	XP_030023900.1	LOC115442848	-0.651523	0.480017	2.33282	0.0227793	0.840648	0.491308	protein BCCIP homolog
XP_030024757.1	XP_030024757.1	LOC115443474	-1.3604	0.190658	2.31233	0.0397206	0.475968	0.696109	obg-like ATPase 1
XP_030022307.1	XP_030022307.1	LOC115441591	-0.593886	0.52704	2.29899	0.0247792	0.85255	0.419827	T-complex protein 1 subunit epsilon, transcript variant X1
XP_030021864.2	XP_030021864.2	LOC115441276	-0.755676	0.208666	2.2957	0.00378868	0.770014	0.352709	venom carboxylesterase-6
XP_030029666.1	XP_030029666.1	LOC115446957	0.629486	0.349157	2.28456	0.00667847	1.45702	0.0850628	nidogen
XP_030040715.2	XP_030040715.2	LOC115456011	-0.684963	0.440622	2.2612	0.0234596	0.788116	0.394762	plastin-2
XP_030039072.1	XP_030039072.1	LOC115454483	-0.22694	0.826181	2.25606	0.0241351	1.01456	0.207471	DNA-directed RNA polymerases I, II, and III subunit RPABC3
XP_030035542.1	XP_030035542.1	LOC115451386	0.373112	0.721417	2.25214	0.0339282	1.31263	0.114212	ELAV-like protein 1
XP_037302111.1	XP_037302111.1	LOC119192402	-0.665018	0.417928	2.23293	0.0182033	0.783955	0.349076	presequence protease, mitochondrial-like
XP_030025331.2	XP_030025331.2	LOC115443881	-0.692414	0.377747	2.21177	0.0157711	0.759681	0.41131	chloride intracellular channel exc-4, transcript variant X1
XP_030040478.1;XP_030040479.1	XP_030040478.1	LOC115455857	-0.591744	0.51772	2.21103	0.0263341	0.809644	0.350482	enoyl-CoA hydratase domain-containing protein 3, mitochondrial, transcript variant X2
XP_030027741.2	XP_030027741.2	LOC115445560	-0.515374	0.52172	2.18406	0.0158434	0.834342	0.346483	juvenile hormone esterase
XP_030038405.2	XP_030038405.2	LOC115453817	-0.342484	0.751509	2.18055	0.0406852	0.919032	0.35825	glycine--tRNA ligase
XP_037298957.1	XP_037298957.1	LOC115453149	-0.0670932	0.944437	2.12616	0.0150448	1.02953	0.16257	programmed cell death protein 4, transcript variant X1
XP_030024924.2	XP_030024924.2	LOC115443601	0.390852	0.681411	2.11097	0.0322471	1.25091	0.101676	uncharacterized LOC115443601, transcript variant X1
XP_030032965.1	XP_030032965.1	LOC115449329	0.247269	0.73679	2.10525	0.00941841	1.17626	0.115518	la protein homolog
XP_030027762.1	XP_030027762.1	LOC115445582	0.0855437	0.930334	2.10471	0.018628	1.09513	0.151314	mannose-6-phosphate isomerase
XP_030038161.1;XP_030038169.1	XP_030038161.1	LOC115453589	-0.151064	0.895543	2.08669	0.0451154	0.967812	0.237542	probable maleylacetoacetate isomerase 2, transcript variant X1
XP_030037084.1	XP_030037084.1	LOC115452643	-0.369875	0.649919	2.05956	0.019533	0.844841	0.392893	probable N-acetyltransferase san
XP_030027034.2	XP_030027034.2	LOC115445087	-0.58922	0.531075	2.05212	0.040778	0.73145	0.409953	glutamine--fructose-6-phosphate aminotransferase [isomerizing] 2
XP_030021164.1	XP_030021164.1	LOC115440826	0.195328	0.833516	2.04427	0.0227793	1.1198	0.132846	probable phospholipid hydroperoxide glutathione peroxidase
XP_030021655.1;XP_030021656.1;XP_030021657.1	XP_030021655.1	LOC115441152	-0.110026	0.912582	2.02932	0.0276891	0.959647	0.263141	insulin-like growth factor 2 mRNA-binding protein 1, transcript variant X1
XP_037292864.1	XP_037292864.1	LOC115453901	0.01237	0.990522	2.02118	0.0185193	1.01677	0.198288	asparagine--tRNA ligase, cytoplasmic
XP_030039719.2;XP_037293181.1	XP_030039719.2	LOC115455181	-0.0817426	0.945972	2.00592	0.0474468	0.962089	0.27273	uncharacterized oxidoreductase SERP2049
XP_030020925.1;XP_037296547.1	XP_030020925.1	LOC115440663	-0.121802	0.913287	1.9885	0.0474969	0.933347	0.228697	geranylgeranyl pyrophosphate synthase, transcript variant X1
XP_030020052.1	XP_030020052.1	LOC115440050	0.526312	0.489635	1.98169	0.0196875	1.254	0.0549296	uncharacterized LOC115440050
XP_030027701.2	XP_030027701.2	LOC115445534	-0.0669529	0.932123	1.95801	0.0104114	0.945528	0.196538	esterase FE4, transcript variant X1
XP_030025734.1	XP_030025734.1	LOC115444198	0.139369	0.896244	1.95124	0.0451129	1.04531	0.162729	RNA-binding protein lark, transcript variant X2
XP_030027035.2	XP_030027035.2	LOC115445088	-0.555605	0.41182	1.94831	0.0143865	0.696351	0.335578	UDP-glucose:glycoprotein glucosyltransferase
XP_030031464.1;XP_030031465.1;XP_030031466.1;XP_030031467.1;XP_030031468.1;XP_030031469.1;XP_037303296.1	XP_030031464.1	LOC115448239	0.124377	0.906293	1.94208	0.041429	1.03323	0.151424	regulator of gene activity, transcript variant X5
XP_030035576.1	XP_030035576.1	LOC115451413	-0.534031	0.449672	1.89476	0.0187704	0.680364	0.336743	CD63 antigen
XP_030033609.1;XP_030033618.1;XP_030033626.1;XP_030033630.1;XP_030033635.1;XP_030033639.1;XP_030033647.1;XP_030033661.1;XP_030033669.1;XP_030033674.1;XP_030033682.1;XP_037294192.1	XP_030033609.1	LOC115449855	-0.714464	0.356973	1.86352	0.0308821	0.574527	0.504593	AMP deaminase 2, transcript variant X10
XP_030032166.1	XP_030032166.1	LOC115448753	-0.00724805	0.996272	1.85941	0.0464168	0.926082	0.19406	phosphomannomutase
XP_030023096.1	XP_030023096.1	LOC115442230	-0.842937	0.325025	1.85845	0.0459938	0.507759	0.558601	uncharacterized LOC115442230
XP_030035786.2	XP_030035786.2	LOC115451572	0.0362401	0.964941	1.85593	0.011517	0.946086	0.168689	esterase GA18864
XP_037298338.1	XP_037298338.1	LOC119190472	-0.0789545	0.93734	1.81804	0.0372871	0.869543	0.207056	malonate--CoA ligase ACSF3, mitochondrial-like
XP_030035919.2	XP_030035919.2	LOC115451690	-0.628281	0.444788	1.81197	0.042004	0.591843	0.450639	BTB/POZ domain-containing protein At1g55760
XP_030028868.1;XP_037300747.1	XP_030028868.1	LOC115446375	-0.619221	0.388221	1.78571	0.026232	0.583245	0.45052	esterase E4, transcript variant X2
XP_030041331.1;XP_037296480.1	XP_030041331.1	LOC115456418	0.226236	0.810028	1.73741	0.0491256	0.981826	0.135276	uncharacterized LOC115456418, transcript variant X2
XP_030028202.1	XP_030028202.1	LOC115445864	0.696225	0.301955	1.70684	0.0241351	1.20153	0.0508899	splicing factor 3A subunit 2
XP_030028020.2;XP_030028021.2;XP_030028022.2;XP_030028023.2	XP_030028020.2	LOC115445758	0.565623	0.322139	1.68831	0.0129192	1.12697	0.0500708	host cell factor 1, transcript variant X4
XP_030033599.2	XP_030033599.2	LOC115449849	0.284386	0.675454	1.68705	0.019533	0.98572	0.097741	metal transporter CNNM4
XP_030021385.1;XP_030021386.1	XP_030021385.1	LOC115440981	-0.457006	0.531949	1.6849	0.0328389	0.613946	0.392893	alanine--tRNA ligase, cytoplasmic, transcript variant X2
XP_030021485.1	XP_030021485.1	LOC115441044	-0.39993	0.579552	1.66203	0.0310851	0.631052	0.504279	UPF0184 protein AAEL002161
XP_030023820.2	XP_030023820.2	LOC115442797	0.267467	0.602765	1.64851	0.00732856	0.957987	0.0650506	NPC intracellular cholesterol transporter 1 homolog 1b-like
XP_030040068.1	XP_030040068.1	LOC115455572	0.00410213	0.997143	1.62186	0.038157	0.812979	0.20106	esterase FE4
XP_030023568.2	XP_030023568.2	LOC115442617	-0.168308	0.827871	1.61342	0.0298826	0.722556	0.271374	caprin-1
XP_037299325.1	XP_037299325.1	LOC115447147	0.615304	0.377747	1.60198	0.0372871	1.10864	0.0713609	zinc finger protein 26
XP_037294088.1	XP_037294088.1	LOC115454639	-0.0210051	0.979437	1.58962	0.0148562	0.784309	0.190641	NAD-dependent protein deacetylase sirtuin-2
XP_030029824.2	XP_030029824.2	LOC115447049	0.0691891	0.923849	1.5801	0.0187954	0.824643	0.117347	ubiquitin-like modifier-activating enzyme 1
XP_037302225.1	XP_037302225.1	LOC119192512	-0.655081	0.350476	1.56982	0.041017	0.457371	0.531949	leucine carboxyl methyltransferase 1-like
XP_030040492.2	XP_030040492.2	LOC115455871	-0.109675	0.880978	1.56886	0.0211364	0.729595	0.228092	calcyclin-binding protein
XP_030025959.1	XP_030025959.1	LOC115444349	0.194217	0.765135	1.56698	0.019533	0.880598	0.0931627	ATP synthase subunit b, mitochondrial
XP_030035936.2;XP_030035938.2	XP_030035936.2	LOC115451701	-0.442606	0.529296	1.55586	0.0385616	0.556625	0.394762	uncharacterized LOC115451701, transcript variant X2
XP_030026899.1;XP_037294051.1;XP_037302302.1	XP_030026899.1	LOC115445002	-0.515216	0.464801	1.54545	0.0415343	0.515118	0.543442	transcription initiation factor IIA subunit 2
XP_030037751.1	XP_030037751.1	LOC115453213	0.0580313	0.947049	1.53272	0.041429	0.795376	0.24131	maternal protein exuperantia-1
XP_037296124.1;XP_037296125.1;XP_037296126.1;XP_037296127.1;XP_037296128.1	XP_037296124.1	LOC115449436	0.191795	0.768503	1.49606	0.0241351	0.843926	0.105891	C-terminal-binding protein, transcript variant X5
XP_030023770.1	XP_030023770.1	LOC115442756	-0.617828	0.332933	1.42102	0.0411536	0.401597	0.533575	WD repeat-containing protein 61
XP_030026873.1	XP_030026873.1	LOC115444985	-0.103282	0.878357	1.41705	0.0211399	0.656882	0.208129	ubiquitin carboxyl-terminal hydrolase isozyme L3
XP_030033931.1	XP_030033931.1	LOC115450098	-0.0203426	0.979753	1.40598	0.0243196	0.692819	0.172417	SUMO-activating enzyme subunit 2
XP_030025085.1;XP_030025167.1;XP_030025238.1	XP_030025085.1	LOC115443681	0.0827973	0.888606	1.40208	0.0143066	0.742441	0.163732	nucleosome assembly protein 1-like 1, transcript variant X3
XP_030031362.1	XP_030031362.1	LOC115448165	0.18048	0.754967	1.3823	0.019533	0.781389	0.0875077	4-aminobutyrate aminotransferase, mitochondrial
XP_030031413.1	XP_030031413.1	LOC115448199	0.526844	0.334775	1.37322	0.0247792	0.950034	0.0526514	RWD domain-containing protein 1
XP_030035308.1	XP_030035308.1	LOC115451210	-0.46877	0.350838	1.36459	0.0185193	0.44791	0.483513	15-hydroxyprostaglandin dehydrogenase [NAD(+)]-like
XP_030041393.2	XP_030041393.2	LOC115456453	-0.49413	0.365825	1.32259	0.0298321	0.414231	0.457364	presequence protease, mitochondrial
XP_030022959.1	XP_030022959.1	LOC115442124	0.433062	0.441783	1.31847	0.0339282	0.875765	0.0725322	60S acidic ribosomal protein P1
XP_037293037.1	XP_037293037.1	LOC115441897	0.158607	0.805997	1.30692	0.0354445	0.732764	0.121133	protein phosphatase 1 regulatory subunit 7
XP_030027699.2;XP_030027700.2	XP_030027699.2	LOC115445533	0.476905	0.409506	1.29157	0.0406845	0.884238	0.175002	juvenile hormone esterase, transcript variant X1
XP_030036310.1	XP_030036310.1	LOC115452016	0.32789	0.531075	1.28754	0.0244486	0.807714	0.0737407	uncharacterized LOC115452016
XP_030031524.2	XP_030031524.2	LOC115448278	0.280799	0.621605	1.213	0.0406845	0.746898	0.179491	mRNA cap guanine-N7 methyltransferase
XP_037294240.1;XP_037301285.1	XP_037294240.1	LOC119189239	0.195154	0.683837	1.18749	0.019533	0.691322	0.117354	ras-related protein ORAB-1-like
XP_030027388.1	XP_030027388.1	LOC115445306	-0.221215	0.680555	1.14633	0.0371619	0.462558	0.343771	V-type proton ATPase subunit G-like
XP_037303331.1	XP_037303331.1	LOC115454192	-0.831559	0.0836058	1.1362	0.0255985	0.15232	0.802344	uncharacterized LOC115454192
XP_030023078.1;XP_030023079.1;XP_030023080.1;XP_030023081.1	XP_030023078.1	LOC115442218	0.362789	0.438268	1.11924	0.0308909	0.741015	0.0829319	RNA-binding protein squid, transcript variant X4
XP_037293191.1;XP_037293192.1	XP_037293191.1	LOC115441935	-0.0851644	0.892867	1.1136	0.0488371	0.514219	0.261504	X-ray repair cross-complementing protein 5, transcript variant X3
XP_030030306.2;XP_037303617.1	XP_030030306.2	LOC115447415	0.179946	0.752725	1.10105	0.0481213	0.6405	0.163253	UPF0587 protein GA18326
XP_030035180.1;XP_037294047.1	XP_030035180.1	LOC115451111	-0.145044	0.773914	-0.972028	0.0482714	-0.558536	0.138613	transforming acidic coiled-coil-containing protein 3, transcript variant X2
XP_030036248.1	XP_030036248.1	LOC115451964	-0.0916925	0.877013	-1.14806	0.0300574	-0.619877	0.147388	Golgi-specific brefeldin A-resistance guanine nucleotide exchange factor 1, transcript variant X1
XP_037301761.1	XP_037301761.1	LOC119192013	0.121917	0.846884	-1.18365	0.041429	-0.530869	0.280685	mitochondrial fission 1 protein-like
XP_030020263.1	XP_030020263.1	LOC115440198	-0.177467	0.754967	-1.19433	0.0348613	-0.685897	0.271374	60S ribosomal protein L37a
XP_030034133.1	XP_030034133.1	LOC115450271	1.0521	0.08001	-1.20747	0.0485595	-0.0776868	0.921586	superoxide dismutase [Cu-Zn]
XP_030021049.1	XP_030021049.1	LOC115440750	0.235758	0.702377	-1.25348	0.0425068	-0.508862	0.349427	60S ribosomal protein L29
XP_030037166.1	XP_030037166.1	LOC115452716	0.356196	0.420839	-1.28993	0.0136742	-0.466869	0.336743	uncharacterized LOC115452716
XP_030027348.1	XP_030027348.1	LOC115445268	-0.795882	0.176075	-1.31596	0.0387913	-1.05592	0.0517394	fumarylacetoacetate hydrolase domain-containing protein 2
XP_030035121.1	XP_030035121.1	LOC115451063	-0.435253	0.430856	-1.31826	0.0311717	-0.876755	0.0517394	acyl-CoA-binding domain-containing protein 6-like
XP_030034467.1;XP_030034468.1	XP_030034467.1	LOC115450550	-0.21177	0.680979	-1.35854	0.0152291	-0.785157	0.0728042	zinc finger protein 706, transcript variant X1
XP_030031454.1	XP_030031454.1	LOC115448231	-0.400476	0.448165	-1.37105	0.0211364	-0.885764	0.0502278	ATP-binding cassette sub-family E member 1
XP_030031859.1;XP_030031860.1;XP_030031861.1;XP_030031862.1	XP_030031859.1	LOC115448544	-0.3121	0.623952	-1.39616	0.0361118	-0.854129	0.109437	lysophospholipase-like protein 1, transcript variant X1
XP_037299599.1	XP_037299599.1	LOC115451554	-0.257531	0.612302	-1.39674	0.0146624	-0.827134	0.102086	phenoloxidase-activating factor 2
XP_030029163.2;XP_037298616.1;XP_037298617.1;XP_037298618.1	XP_030029163.2	LOC115446584	-0.242378	0.733945	-1.39995	0.0467935	-0.821165	0.11218	protein pigeon, transcript variant X3
XP_030020362.2;XP_037296098.1;XP_037301259.1	XP_030020362.2	LOC115440272	0.744881	0.22648	-1.40057	0.0369247	-0.327844	0.646047	translation machinery-associated protein 7 homolog
XP_037300498.1	XP_037300498.1	LOC115453465	1.23202	0.0611571	-1.40248	0.0358602	-0.0852307	0.92096	peptidyl-prolyl cis-trans isomerase-like 3
XP_030040628.1	XP_030040628.1	LOC115455941	-0.287954	0.585359	-1.41226	0.0161007	-0.850107	0.0607049	probable 28S ribosomal protein S16, mitochondrial
XP_030022252.1;XP_030022253.1;XP_030022254.1	XP_030022252.1	LOC115441565	-0.660029	0.301556	-1.42232	0.0411536	-1.04118	0.0774557	acyl-CoA-binding domain-containing protein 5, transcript variant X3
XP_030023600.1	XP_030023600.1	LOC115442637	-0.261174	0.643448	-1.43809	0.0193674	-0.84963	0.108365	glutamine-dependent NAD(+) synthetase
XP_030031107.1	XP_030031107.1	LOC115447941	-0.144115	0.829774	-1.44072	0.0255985	-0.792419	0.108674	protein obstructor-E
XP_037299286.1	XP_037299286.1	LOC115453349	-0.240565	0.675956	-1.44571	0.0192407	-0.843135	0.0779871	D-2-hydroxyglutarate dehydrogenase, mitochondrial
XP_030025264.1;XP_030025265.1	XP_030025264.1	LOC115443826	0.0115367	0.990017	-1.45115	0.0356676	-0.719808	0.207056	pyrroline-5-carboxylate reductase, transcript variant X1
XP_030025871.1	XP_030025871.1	LOC115444285	-0.384825	0.489635	-1.45648	0.019533	-0.920652	0.05984	NADP-dependent malic enzyme
XP_030023265.1;XP_037301694.1	XP_030023265.1	LOC115442380	-0.65798	0.328798	-1.46958	0.0451129	-1.06378	0.0579479	putative aldehyde dehydrogenase family 7 member A1 homolog
XP_030036433.1;XP_037298066.1	XP_030036433.1	LOC115452117	0.0523705	0.947849	-1.48618	0.0354445	-0.716906	0.196538	protein phosphatase 1 regulatory subunit 14B, transcript variant X1
XP_030023499.1	XP_030023499.1	LOC115442572	-0.184139	0.814009	-1.50458	0.041429	-0.844358	0.235675	C-factor
XP_030024479.2;XP_030024480.2;XP_037292849.1;XP_037292851.1	XP_030024479.2	LOC115443272	-0.00649412	0.994287	-1.52954	0.0224964	-0.768016	0.150777	transport and Golgi organization protein 2, transcript variant X3
XP_030026825.2	XP_030026825.2	LOC115444955	-0.458291	0.535937	-1.54809	0.0481213	-1.00319	0.216616	mRNA turnover protein 4 homolog
XP_030019581.2;XP_030019583.2	XP_030019581.2	LOC115439743	-0.464413	0.449914	-1.55496	0.0237053	-1.00968	0.0523122	putative aminopeptidase W07G4.4, transcript variant X2
XP_030024176.2	XP_030024176.2	LOC115443050	-0.404208	0.541071	-1.55614	0.0302206	-0.980173	0.0719204	transmembrane protein 87A
XP_030023532.1	XP_030023532.1	LOC115442595	0.00959858	0.9903	-1.56681	0.0144721	-0.778606	0.180384	putative acyl-CoA-binding protein
XP_030023263.2;XP_037301137.1	XP_030023263.2	LOC115442378	-0.122087	0.885526	-1.57625	0.0383846	-0.84917	0.247808	peroxisomal targeting signal 1 receptor
XP_037299154.1	XP_037299154.1	LOC115453207	-0.653914	0.361126	-1.57783	0.0425068	-1.11587	0.0646992	proton-coupled folate transporter
XP_030037748.1	XP_030037748.1	LOC115453209	0.475622	0.481503	-1.58418	0.0318739	-0.554279	0.394092	cytochrome c oxidase assembly factor 7 homolog
XP_030028295.2	XP_030028295.2	LOC115445924	-0.728784	0.184578	-1.59667	0.0130469	-1.16273	0.0500711	regucalcin-like, transcript variant X1
XP_030034358.2;XP_030034359.2;XP_030034360.2	XP_030034358.2	LOC115450469	-0.117444	0.873843	-1.5973	0.0194265	-0.85737	0.109276	cysteine-rich with EGF-like domain protein 2, transcript variant X2
XP_030020380.1;XP_037296103.1	XP_030020380.1	LOC115440284	-0.321088	0.669668	-1.60056	0.0386442	-0.960825	0.152347	hemolymph trypsin inhibitor A
XP_030029167.1;XP_030029168.1	XP_030029167.1	LOC115446587	0.214381	0.759243	-1.60788	0.0235279	-0.69675	0.268548	coiled-coil domain-containing protein 124, transcript variant X1
XP_030039452.2;XP_030039458.2	XP_030039452.2	LOC115454881	0.357318	0.486745	-1.66424	0.00771721	-0.65346	0.290373	G-protein-signaling modulator 2, transcript variant X1
XP_030035521.2;XP_037292480.1;XP_037292481.1	XP_030035521.2	LOC115451372	-0.304191	0.721417	-1.68816	0.0467935	-0.996175	0.107235	fibrillin-2, transcript variant X2
XP_037294055.1	XP_037294055.1	LOC115446812	0.0495358	0.96081	-1.72591	0.0372266	-0.838185	0.253505	insecticyanin-B-like
XP_030029598.1	XP_030029598.1	LOC115446903	-0.506336	0.529184	-1.73972	0.041429	-1.12303	0.0916428	enoyl-CoA delta isomerase 2
XP_030028368.1;XP_030028369.1	XP_030028368.1	LOC115445979	-0.0266666	0.978863	-1.74788	0.0227346	-0.887274	0.149837	adenylate kinase isoenzyme 1, transcript variant X2
XP_037293656.1;XP_037293657.1;XP_037293658.1;XP_037293659.1	XP_037293656.1	LOC115451879	0.976379	0.231734	-1.74981	0.0465382	-0.386714	0.668925	E3 ubiquitin-protein ligase RBBP6, transcript variant X2
XP_037299294.1	XP_037299294.1	LOC115454017	-0.0811499	0.903337	-1.75011	0.00953833	-0.915631	0.107309	phenoloxidase-activating factor 2-like
XP_030029471.1	XP_030029471.1	LOC115446807	-1.0104	0.197789	-1.75147	0.0397206	-1.38094	0.0582363	mitochondrial inner membrane protein OXA1L
XP_030024286.2	XP_030024286.2	LOC115443145	-0.40102	0.528865	-1.75626	0.0152272	-1.07864	0.0566412	probable serine hydrolase
XP_030031537.2;XP_030031553.2;XP_037298716.1	XP_030031537.2	LOC115448273	0.0425949	0.955039	-1.76819	0.0117556	-0.862798	0.166734	sulfite oxidase, mitochondrial, transcript variant X3
XP_030020628.1	XP_030020628.1	LOC115440452	0.0995544	0.879589	-1.77234	0.00773028	-0.836394	0.132887	xanthine dehydrogenase
XP_030030696.1	XP_030030696.1	LOC115447657	0.710558	0.367706	-1.78437	0.0390291	-0.536906	0.487564	retinoid-inducible serine carboxypeptidase
XP_037301753.1	XP_037301753.1	LOC119192004	-0.432941	0.555542	-1.8357	0.0229135	-1.13432	0.0582363	membrane alanyl aminopeptidase-like
XP_030037036.1;XP_030037037.1;XP_030037038.1;XP_030037039.1;XP_030037040.2;XP_030037041.1;XP_030037042.1;XP_030037043.1;XP_030037044.1;XP_030037046.1;XP_030037047.1;XP_030037048.1;XP_037299603.1;XP_037299605.1;XP_037299606.1	XP_030037036.1	LOC115452604	-0.500105	0.471689	-1.8562	0.0187073	-1.17815	0.0799985	alaserpin-like, transcript variant X31
XP_037293576.1	XP_037293576.1	LOC115443565	0.0807919	0.921632	-1.86483	0.0158434	-0.892018	0.195306	serine protease nudel-like
XP_030021778.2	XP_030021778.2	LOC115441224	0.912613	0.262523	-1.88246	0.0354445	-0.484925	0.576499	fibrillin-3
XP_037299278.1;XP_037299279.1;XP_037299280.1	XP_037299278.1	LOC115452988	0.123479	0.879246	-1.8837	0.0150573	-0.880111	0.204181	glycogen debranching enzyme-like, transcript variant X2
XP_030028423.1	XP_030028423.1	LOC115446022	0.367415	0.59954	-1.88399	0.0157711	-0.758289	0.355761	UPF0598 protein CG30010
XP_030025467.2	XP_030025467.2	LOC115444003	-0.0219234	0.983538	-1.89041	0.019533	-0.956169	0.130857	uncharacterized protein DDB_G0283357
XP_030030751.2;XP_030030752.2;XP_030030754.2	XP_030030751.2	LOC115447699	0.386693	0.623952	-1.93851	0.022273	-0.775909	0.381025	probable polyamine oxidase 5, transcript variant X1
XP_037293665.1;XP_037293666.1;XP_037293667.1	XP_037293665.1	LOC115443676	0.335209	0.528531	-1.95345	0.00433274	-0.809122	0.184931	protein shuttle craft, transcript variant X1
XP_030025273.2	XP_030025273.2	LOC115443831	-0.116874	0.854049	-1.9561	0.00486882	-1.03649	0.0650506	fibrillin-1
XP_037298926.1	XP_037298926.1	LOC115452429	-0.410115	0.595413	-1.96534	0.019533	-1.18773	0.071174	interferon-related developmental regulator 2, transcript variant X3
XP_030031220.1;XP_030031222.1;XP_030031223.1;XP_037295431.1;XP_037295432.1	XP_030031220.1	LOC115448061	0.238064	0.826181	-1.99578	0.0485595	-0.878859	0.300975	ester hydrolase C11orf54 homolog, transcript variant X1
XP_030036637.2	XP_030036637.2	LOC115452299	0.969463	0.244192	-2.00065	0.0298529	-0.515593	0.664374	U-scoloptoxin(16)-Ssd1a
XP_030023943.1;XP_030023944.1;XP_037299646.1	XP_030023943.1	LOC115442888	0.0379794	0.949947	-2.00928	0.00239561	-0.985648	0.092093	probable medium-chain specific acyl-CoA dehydrogenase, mitochondrial, transcript variant X2
XP_030033094.1	XP_030033094.1	LOC115449418	0.283599	0.666635	-2.01635	0.00804348	-0.866373	0.200954	venom acid phosphatase Acph-1-like
XP_037295796.1	XP_037295796.1	LOC115455272	-0.52953	0.589505	-2.04683	0.045795	-1.28818	0.0829915	lactase-phlorizin hydrolase
XP_030025881.2	XP_030025881.2	LOC115444295	0.992587	0.288169	-2.05239	0.0433901	-0.5299	0.586769	plasminogen activator inhibitor 2, macrophage
XP_030035318.1	XP_030035318.1	LOC115451219	0.116636	0.891192	-2.05638	0.0136742	-0.969871	0.159109	15-hydroxyprostaglandin dehydrogenase [NAD(+)]
XP_030038866.2	XP_030038866.2	LOC115454261	0.529736	0.537398	-2.11985	0.0241351	-0.795057	0.362977	uncharacterized LOC115454261
XP_030020838.1;XP_037298433.1	XP_030020838.1	LOC115440601	-1.27222	0.19121	-2.12276	0.0427185	-1.69749	0.0560509	WW domain-containing oxidoreductase, transcript variant X2
XP_030020434.2;XP_037296225.1	XP_030020434.2	LOC115440327	0.147387	0.810028	-2.12562	0.00334179	-0.989115	0.14253	transferrin-like, transcript variant X1
XP_030026337.2;XP_030026338.2;XP_030026339.2	XP_030026337.2	LOC115444628	0.590344	0.522572	-2.16658	0.0300574	-0.788119	0.361476	endoplasmic reticulum metallopeptidase 1, transcript variant X2
XP_030026637.1;XP_030026638.1	XP_030026637.1	LOC115444841	-0.50132	0.621889	-2.16702	0.0406845	-1.33417	0.0877333	predicted GPI-anchored protein 58, transcript variant X4
XP_037294821.1;XP_037294858.1;XP_037301140.1	XP_037294821.1	LOC115445178	-0.654574	0.393854	-2.17235	0.0152922	-1.41346	0.149058	beta-1,3-glucan-binding protein
XP_030020297.1	XP_030020297.1	LOC115440221	-0.176935	0.884068	-2.18829	0.0433336	-1.18261	0.157243	chitinase domain-containing protein 1
XP_037296931.1	XP_037296931.1	LOC115445065	-0.499686	0.638154	-2.28388	0.0389267	-1.39178	0.122203	proton-coupled folate transporter
XP_030028591.2	XP_030028591.2	LOC115446165	0.495156	0.417928	-2.33279	0.0040654	-0.918816	0.242532	ribosome-recycling factor, mitochondrial
XP_030021451.1;XP_037297994.1	XP_030021451.1	LOC115441025	-0.0890347	0.943853	-2.34268	0.0313574	-1.21586	0.179773	E3 ubiquitin-protein ligase Su(dx), transcript variant X1
XP_030023802.1;XP_030024568.1	XP_030023802.1	LOC115442504	-0.922836	0.338312	-2.35611	0.0281588	-1.63947	0.0574279	protein mini spindles, transcript variant X1
XP_030038007.1	XP_030038007.1	LOC115453453	-0.562085	0.611792	-2.35738	0.041429	-1.45973	0.0809462	growth-blocking peptide, long form
XP_030020897.1	XP_030020897.1	LOC115440644	0.555406	0.487081	-2.36317	0.0117556	-0.903881	0.321215	ATP-binding cassette sub-family G member 4, transcript variant X1
XP_030033518.2	XP_030033518.2	LOC115449769	1.0653	0.334661	-2.3691	0.0480407	-0.651897	0.62019	uncharacterized LOC115449769
XP_030027623.2	XP_030027623.2	LOC115445480	-0.531641	0.62894	-2.4278	0.0354445	-1.47972	0.0794656	membrane-bound alkaline phosphatase
XP_030032236.2	XP_030032236.2	LOC115448813	-0.732943	0.435966	-2.49021	0.019533	-1.61158	0.0515597	uncharacterized LOC115448813
XP_030030679.2	XP_030030679.2	LOC115447647	0.320156	0.668372	-2.4935	0.00559911	-1.08667	0.20137	scolexin B
XP_030026184.1	XP_030026184.1	LOC115444523	0.0444758	0.961072	-2.57619	0.00462373	-1.26586	0.108495	aldo-keto reductase AKR2E4
XP_037301135.1	XP_037301135.1	LOC115439893	-1.56591	0.179156	-2.57655	0.0406852	-2.07123	0.0577129	perilipin-4
XP_030036479.2	XP_030036479.2	LOC115452156	-0.279296	0.761656	-2.66619	0.00881461	-1.47274	0.065307	aldo-keto reductase AKR2E4
XP_030021184.2;XP_030021185.2;XP_030021186.2	XP_030021184.2	LOC115440835	-0.505344	0.589505	-2.7763	0.0104351	-1.64082	0.103271	uncharacterized LOC115440835, transcript variant X3
XP_030023109.2	XP_030023109.2	LOC115442242	-0.526062	0.671688	-2.9635	0.0235557	-1.74478	0.0725272	synaptic vesicle glycoprotein 2C-like
XP_030041055.1	XP_030041055.1	LOC115456225	-0.688746	0.55434	-2.99064	0.0201209	-1.8397	0.0593	ubiquitin-fold modifier-conjugating enzyme 1
XP_030028469.2	XP_030028469.2	LOC115446056	-0.227633	0.849199	-3.17259	0.00953833	-1.70011	0.0829319	malate synthase
XP_030026397.1	XP_030026397.1	LOC115444669	-0.689759	0.356917	-3.1933	0.00219858	-1.94153	0.0713609	larval cuticle protein LCP-14-like
XP_037294788.1	XP_037294788.1	LOC119189395	-0.445098	0.726977	-3.2538	0.0158434	-1.84945	0.091726	protein TsetseEP-like
XP_037294700.1;XP_037301063.1	XP_037294700.1	LOC115455200	0.119516	0.947049	-3.30615	0.0354445	-1.59332	0.280874	cohesin subunit SA-1
XP_037296139.1	XP_037296139.1	LOC115455434	0.0171299	0.993914	-3.34631	0.0357771	-1.66459	0.294415	myrosinase 1
XP_030032725.2	XP_030032725.2	LOC115449140	-1.08255	0.416659	-3.38069	0.0237789	-2.23162	0.0550622	membrane alanyl aminopeptidase
XP_030029335.1	XP_030029335.1	LOC115446700	0.0441612	0.979869	-3.38288	0.0200785	-1.66936	0.143182	homogentisate 1,2-dioxygenase
XP_030022570.1	XP_030022570.1	LOC115441804	0.0418111	0.977156	-3.55393	0.00564693	-1.75606	0.121133	glutathione S-transferase 2-like
XP_037295659.1	XP_037295659.1	LOC115451500	0.0100446	0.99095	-3.57644	0.000459364	-1.7832	0.0514143	hemocytin
XP_037297829.1;XP_037297830.1	XP_037297829.1	LOC119190301	0.103912	0.910334	-3.69456	0.000954384	-1.79532	0.0725272	alpha-methylacyl-CoA racemase-like, transcript variant X1
XP_030034200.2;XP_030034201.2	XP_030034200.2	LOC115450343	0.765282	0.575948	-3.70795	0.015715	-1.47133	0.319758	acetylcholinesterase
XP_030033062.2	XP_030033062.2	LOC115449397	0.482506	0.689153	-3.74254	0.00735097	-1.63002	0.180384	probable tRNA(His) guanylyltransferase
XP_030024046.2;XP_037297868.1;XP_037302005.1	XP_030024046.2	LOC115442959	-0.13475	0.885706	-3.95011	0.000771142	-2.04243	0.0713609	trypsin, alkaline C-like
XP_030028830.2	XP_030028830.2	LOC115446351	-0.406168	0.756533	-4.59686	0.00372963	-2.50151	0.0675428	kynureninase-like
XP_030041407.1	XP_030041407.1	LOC115456458	-1.25149	0.439338	-5.11421	0.00928648	-3.18285	0.0504224	larval cuticle protein LCP-17
XP_030034215.2;XP_037294615.1	XP_030034215.2	LOC115450359	4.63237	0.0154175	-0.0304011	0.984782	2.30098	0.112506	beta-alanine transporter, transcript variant X2
XP_037299474.1	XP_037299474.1	LOC115452603	4.3085	0.019767	0.733782	0.647784	2.52114	0.111833	2-oxoglutarate dehydrogenase, mitochondrial, transcript variant X8
XP_030028562.2;XP_037293432.1	XP_030028562.2	LOC115446143	3.50948	0.0110813	0.243481	0.834641	1.87648	0.111362	acid phosphatase type 7, transcript variant X2
XP_030026420.1;XP_030026430.1;XP_037296836.1;XP_037296837.1	XP_030026420.1	LOC115444681	3.4827	0.0408767	0.761603	0.635601	2.12215	0.0921306	myosin light chain 1, transcript variant X1
XP_030019718.1	XP_030019718.1	LOC115439837	3.41677	0.00170523	-0.564169	0.393754	1.4263	0.147388	nuclear protein 1
XP_030032349.1	XP_030032349.1	LOC115448887	3.34914	0.0430029	0.645627	0.68332	1.99739	0.0989787	cytochrome c oxidase subunit 5A, mitochondrial
XP_030030481.1;XP_030030482.1	XP_030030481.1	LOC115447517	3.32902	0.00748724	0.177463	0.855412	1.75324	0.0952908	high mobility group protein I, transcript variant X2
XP_030027660.1	XP_030027660.1	LOC115445513	3.29572	0.0209758	0.334541	0.805324	1.81513	0.116928	fatty acid-binding protein 2-like
XP_030031971.1	XP_030031971.1	LOC115448624	3.20742	0.0366578	-0.298636	0.847847	1.45439	0.209971	pro-neuropeptide Y
XP_030028669.1;XP_030028677.1;XP_030028686.1;XP_030028694.1;XP_030028703.1;XP_030028711.1;XP_037296464.1	XP_030028669.1	LOC115446228	3.0724	0.0261446	-0.106031	0.937312	1.48319	0.194767	pollen-specific leucine-rich repeat extensin-like protein 3, transcript variant X12
XP_037299480.1;XP_037299483.1	XP_037299480.1	LOC115447513	3.04188	0.0266863	0.424758	0.744861	1.73332	0.097741	PDZ and LIM domain protein 3, transcript variant X1
XP_030024540.2;XP_037297859.1	XP_030024540.2	LOC115443319	3.00567	0.0198095	1.33732	0.208493	2.17149	0.0725272	uncharacterized LOC115443319, transcript variant X2
XP_030030429.1	XP_030030429.1	LOC115447483	2.85016	0.0358774	0.852738	0.488533	1.85145	0.108365	beta-hexosaminidase subunit beta
XP_030030175.1;XP_030030176.1	XP_030030175.1	LOC115447302	2.81293	0.0186677	0.375948	0.726145	1.59444	0.141578	endochitinase-like, transcript variant X2
XP_030029212.1;XP_030029224.1;XP_030029227.1;XP_030029230.1;XP_037297326.1;XP_037297327.1	XP_030029212.1	LOC115446640	2.61422	0.0349669	0.225312	0.8549	1.41977	0.114566	troponin I, transcript variant X13
XP_030024470.1;XP_030024472.1;XP_037292628.1	XP_030024470.1	LOC115443267	2.58788	0.0234757	0.292218	0.790221	1.44005	0.0794656	serine/threonine-protein phosphatase Pgam5, mitochondrial, transcript variant X2
XP_030021814.2;XP_030021823.2;XP_030021831.2	XP_030021814.2	LOC115441239	2.5825	0.0388062	0.621809	0.596487	1.60216	0.108345	nucleolar protein dao-5, transcript variant X3
XP_037294251.1	XP_037294251.1	LOC115453977	2.53494	0.0334016	0.580511	0.599458	1.55773	0.0828092	papilin-like, transcript variant X2
XP_030035935.1;XP_037301147.1	XP_030035935.1	LOC115451700	2.52843	0.047435	0.217069	0.868555	1.37275	0.181193	DNA-directed RNA polymerase II subunit RPB9
XP_037302764.1;XP_037302766.1;XP_037302770.1	XP_037302764.1	LOC115453561	2.51419	0.0453375	-0.905648	0.431629	0.804271	0.526809	extensin-2, transcript variant X1
XP_037294749.1;XP_037294751.1;XP_037294752.1;XP_037294753.1	XP_037294749.1	LOC115454837	2.44725	0.0223522	0.81291	0.365609	1.63008	0.0583629	lysosomal alpha-glucosidase-like, transcript variant X1
XP_030041105.1;XP_030041107.1;XP_030041108.1;XP_030041110.1;XP_037297623.1	XP_030041105.1	LOC115456256	2.44338	0.0207644	-0.175314	0.859519	1.13403	0.221928	tetratricopeptide repeat protein 14 homolog, transcript variant X2
XP_037293247.1	XP_037293247.1	LOC115449171	2.38988	0.0123779	-0.752454	0.306721	0.818711	0.342916	dynamin-like 120 kDa protein, mitochondrial
XP_037293910.1;XP_037293934.1;XP_037293969.1	XP_037293910.1	LOC115452746	2.34957	0.0123779	-0.170874	0.837035	1.08935	0.226151	nuclear pore complex protein Nup98-Nup96, transcript variant X3
XP_030040048.1;XP_037303602.1;XP_037303603.1;XP_037303604.1;XP_037303605.1	XP_030040048.1	LOC115455563	2.34401	0.0123779	0.710433	0.32481	1.52722	0.0526514	putative oxidoreductase GLYR1 homolog, transcript variant X4
XP_030028685.1	XP_030028685.1	LOC115446241	2.30874	0.0187198	-1.56972	0.0601831	0.369508	0.840581	allergen Tha p 1
XP_030041329.2;XP_037296645.1	XP_030041329.2	LOC115456415	2.2282	0.0429788	0.215995	0.848267	1.2221	0.375067	trypsin-1
XP_037301042.1	XP_037301042.1	LOC115448667	2.18284	0.0261446	-0.826617	0.323078	0.678111	0.425693	trypsin, alkaline A-like, transcript variant X2
XP_030034285.1	XP_030034285.1	LOC115450413	2.15719	0.0115893	0.355991	0.591846	1.25659	0.0519029	probable small nuclear ribonucleoprotein Sm D1
XP_030035635.1	XP_030035635.1	LOC115451449	2.10961	0.0312054	0.696522	0.414465	1.40307	0.0508899	ATP synthase subunit e, mitochondrial
XP_037298907.1	XP_037298907.1	LOC115441113	2.07041	0.0123779	-0.669995	0.291312	0.700206	0.360419	tissue inhibitor of metalloproteinase
XP_037302940.1	XP_037302940.1	LOC119188577	2.03078	0.0295216	0.24736	0.787407	1.13907	0.0891137	uncharacterized LOC119188577
XP_030030166.1	XP_030030166.1	LOC115447296	2.02519	0.0342697	0.304491	0.744599	1.16484	0.163732	COX assembly mitochondrial protein 2 homolog, transcript variant X2
XP_037293004.1	XP_037293004.1	LOC115450880	1.97605	0.0312054	0.424306	0.61253	1.20018	0.065307	uncharacterized LOC115450880
XP_037298686.1;XP_037298692.1;XP_037298696.1	XP_037298686.1	LOC115442980	1.97516	0.0123779	0.840663	0.162866	1.40791	0.100191	zinc finger protein ubi-d4 B, transcript variant X3
XP_030031637.1	XP_030031637.1	LOC115448366	1.96049	0.0465518	0.501163	0.595306	1.23083	0.0737407	survival of motor neuron-related-splicing factor 30
XP_030031403.1	XP_030031403.1	LOC115448195	1.92094	0.0218534	0.371696	0.614852	1.14632	0.113942	cell division cycle 5-like protein
XP_030026509.2	XP_030026509.2	LOC115444746	1.88715	0.0106869	-1.0736	0.0568861	0.406777	0.615157	uncharacterized LOC115444746
XP_030029137.1	XP_030029137.1	LOC115446569	1.81659	0.0478236	0.271025	0.775971	1.04381	0.114566	acyl carrier protein, mitochondrial, transcript variant X1
XP_030031789.1	XP_030031789.1	LOC115448503	1.73244	0.0489537	0.608361	0.459799	1.1704	0.142984	protein PRRC1
XP_037293541.1;XP_037293542.1	XP_037293541.1	LOC115449586	1.72084	0.0483997	0.761796	0.341721	1.24132	0.0630502	proline-, glutamic acid- and leucine-rich protein 1, transcript variant X2
XP_030029159.2	XP_030029159.2	LOC115446581	1.70219	0.0478236	0.0162285	0.984746	0.859208	0.207204	uncharacterized protein C19orf47 homolog
XP_030034445.1	XP_030034445.1	LOC115450534	1.68382	0.0261446	0.31745	0.640828	1.00063	0.0665599	small nuclear ribonucleoprotein-associated protein B
XP_030021747.2;XP_030021753.2;XP_037300891.1	XP_030021747.2	LOC115441206	1.64965	0.0322783	0.112175	0.878243	0.88091	0.122695	supervillin, transcript variant X2
XP_030024622.1;XP_030024623.1	XP_030024622.1	LOC115443389	1.64821	0.0275284	0.184821	0.801873	0.916517	0.0931627	rap guanine nucleotide exchange factor 2, transcript variant X2
XP_030034960.1	XP_030034960.1	LOC115450924	1.62654	0.0445168	0.67688	0.354621	1.15171	0.0650506	histone deacetylase HDAC1
XP_037298251.1;XP_037298252.1;XP_037298253.1;XP_037298254.1;XP_037298255.1;XP_037298256.1;XP_037298257.1;XP_037298258.1;XP_037298259.1;XP_037298262.1;XP_037298264.1;XP_037298265.1	XP_037298251.1	LOC115440427	1.62567	0.0152254	0.187953	0.748676	0.906811	0.104001	disks large 1 tumor suppressor protein, transcript variant X15
XP_030029345.1;XP_037300870.1	XP_030029345.1	LOC115446710	1.58585	0.0429454	-0.0491295	0.948956	0.768359	0.19406	transcription factor A, mitochondrial, transcript variant X2
XP_030034905.2;XP_037292279.1	XP_030034905.2	LOC115450893	1.57178	0.0435484	-0.362674	0.621562	0.604553	0.347842	uncharacterized threonine-rich GPI-anchored glycoprotein PJ4664.02, transcript variant X2
XP_030034641.2	XP_030034641.2	LOC115450702	1.56769	0.047435	-0.434968	0.562804	0.566359	0.383896	probable rRNA-processing protein EBP2 homolog
XP_030029059.1	XP_030029059.1	LOC115446520	1.54729	0.0334016	0.480955	0.459378	1.01412	0.0570195	uncharacterized oxidoreductase YjmC, transcript variant X1
XP_030038531.1	XP_030038531.1	LOC115453945	1.53788	0.0478236	0.437194	0.555154	0.987538	0.0719204	dnaJ homolog subfamily C member 21
XP_030035003.1	XP_030035003.1	LOC115450964	1.53483	0.0167814	0.280965	0.610253	0.907899	0.0646992	toll-interacting protein
XP_030022498.1	XP_030022498.1	LOC115441737	1.53258	0.0480739	0.512833	0.481004	1.0227	0.05984	uncharacterized LOC115441737
XP_030032142.1	XP_030032142.1	LOC115448735	1.5168	0.0474808	-0.0546508	0.943609	0.731073	0.207471	trypsin, alkaline A-like
XP_030022917.1	XP_030022917.1	LOC115442087	1.46821	0.0405436	0.441151	0.499316	0.954682	0.0725272	uncharacterized LOC115442087, transcript variant X2
XP_030027533.1	XP_030027533.1	LOC115445414	1.44859	0.0478236	-0.707704	0.290931	0.370444	0.618876	protein-L-isoaspartate(D-aspartate) O-methyltransferase
XP_030024794.1;XP_030024795.1	XP_030024794.1	LOC115443496	1.42643	0.0488066	0.411633	0.55282	0.919032	0.182265	golgin subfamily A member 6-like protein 1, transcript variant X2
XP_030020965.1	XP_030020965.1	LOC115440690	1.40686	0.0429788	-0.558864	0.37101	0.424	0.561836	protein CutA homolog
XP_037294999.1	XP_037294999.1	LOC115444755	1.35558	0.0334016	-0.396527	0.488186	0.479528	0.372872	ADAMTS-like protein 4
XP_030023009.1	XP_030023009.1	LOC115442162	1.34118	0.0353503	-0.429959	0.453348	0.455612	0.498136	ATP-dependent RNA helicase SUV3 homolog, mitochondrial
XP_030025819.1	XP_030025819.1	LOC115444258	1.34108	0.0405436	0.409585	0.492046	0.875332	0.0586072	probable small nuclear ribonucleoprotein Sm D2
XP_030023810.1	XP_030023810.1	LOC115442791	1.33478	0.0312277	-0.369524	0.503611	0.482629	0.43916	alkyldihydroxyacetonephosphate synthase
XP_030032035.1;XP_030032036.1	XP_030032035.1	LOC115448673	1.31637	0.0312277	0.294962	0.599907	0.805666	0.0725272	ornithine aminotransferase, mitochondrial, transcript variant X1
XP_030026851.1	XP_030026851.1	LOC115444967	1.25193	0.0428919	0.141196	0.825775	0.696563	0.225535	rab11 family-interacting protein 2
XP_037299308.1	XP_037299308.1	LOC119190754	1.22653	0.0435286	0.457282	0.403936	0.841905	0.112803	2Fe-2S ferredoxin
XP_030033356.1	XP_030033356.1	LOC115449633	1.08655	0.0445168	0.0501311	0.928776	0.568342	0.299373	carbonyl reductase [NADPH] 3
XP_037303279.1	XP_037303279.1	LOC115444455	1.07532	0.047435	-0.0252108	0.964551	0.525054	0.304246	zinc finger MYM-type protein 4
XP_030027310.1	XP_030027310.1	LOC115445244	-1.07934	0.0353503	0.267223	0.575444	-0.406056	0.391369	B-cell receptor-associated protein 31
XP_037297217.1	XP_037297217.1	LOC115445852	-1.31834	0.047435	0.30966	0.62515	-0.504338	0.378133	protein lava lamp-like
XP_030034270.2;XP_030034272.2;XP_030034273.2;XP_030034274.2	XP_030034270.2	LOC115450402	-1.36594	0.0209758	-0.204167	0.701457	-0.785051	0.0724313	dihydrolipoyllysine-residue succinyltransferase component of 2-oxoglutarate dehydrogenase complex, mitochondrial, transcript variant X3
XP_037300590.1	XP_037300590.1	LOC115452293	-1.36658	0.0431634	0.187603	0.786558	-0.58949	0.271823	multidrug resistance-associated protein 4
XP_030024609.2	XP_030024609.2	LOC115443372	-1.39828	0.0267888	0.200769	0.737796	-0.598755	0.263141	glutathione S-transferase 1-like
XP_030030126.2	XP_030030126.2	LOC115447268	-1.41365	0.0344302	-0.0487738	0.941317	-0.731211	0.14506	ER degradation-enhancing alpha-mannosidase-like protein 3
XP_030032170.1	XP_030032170.1	LOC115448757	-1.41696	0.0234757	0.770701	0.144375	-0.323127	0.605679	protein singed
XP_030021759.1	XP_030021759.1	LOC115441209	-1.49121	0.0292953	0.613116	0.299441	-0.439046	0.630628	ABC transporter F family member 4
XP_037292971.1;XP_037292972.1;XP_037292973.1	XP_037292971.1	LOC115446219	-1.53108	0.0353503	0.117061	0.871551	-0.707008	0.250108	protein transport protein Sec31A, transcript variant X1
XP_030024478.1	XP_030024478.1	LOC115443271	-1.55236	0.0237083	-0.504245	0.386818	-1.0283	0.0713609	AP-1 complex subunit beta-1
XP_030034453.1	XP_030034453.1	LOC115450542	-1.57286	0.047435	-0.294083	0.705349	-0.933469	0.110843	39S ribosomal protein L3, mitochondrial
XP_030027467.1	XP_030027467.1	LOC115445370	-1.60879	0.0312277	0.731018	0.260307	-0.438888	0.528013	centrosome-associated zinc finger protein CP190
XP_030041113.2	XP_030041113.2	LOC115456259	-1.67691	0.0478236	-0.86763	0.262214	-1.27227	0.0820298	myosin-VIIa
XP_037302969.1	XP_037302969.1	LOC115441499	-1.68397	0.0405436	0.0566228	0.944115	-0.813672	0.306688	sodium-dependent nutrient amino acid transporter 1
XP_037292759.1;XP_037292760.1	XP_037292759.1	LOC115442406	-1.71375	0.0326928	0.938695	0.178307	-0.387527	0.630423	BRCA1-associated protein, transcript variant X1
XP_037298076.1	XP_037298076.1	LOC115452114	-1.7666	0.0154175	-0.0269941	0.966008	-0.896797	0.127359	serine palmitoyltransferase 2
XP_030035624.1;XP_037301699.1	XP_030035624.1	LOC115451444	-1.79459	0.0409922	0.250329	0.778595	-0.772131	0.261514	alpha-centractin
XP_037293853.1	XP_037293853.1	LOC115451935	-1.80001	0.0473385	0.0502133	0.956825	-0.874898	0.276671	60S ribosomal protein L38
XP_030035422.1	XP_030035422.1	LOC115451285	-1.84863	0.0448616	-0.182437	0.848267	-1.01553	0.130565	mitochondrial import inner membrane translocase subunit TIM44
XP_030021129.2	XP_030021129.2	LOC115440799	-1.88224	0.041216	0.750981	0.362879	-0.565627	0.530097	para-nitrobenzyl esterase
XP_037299196.1;XP_037299197.1	XP_037299196.1	LOC115454170	-1.9002	0.0368892	0.830761	0.302055	-0.534721	0.519843	phospholipase A-2-activating protein, transcript variant X1
XP_037296758.1	XP_037296758.1	LOC115450851	-1.90475	0.0231059	1.30923	0.0700968	-0.297759	0.757198	glutamate--cysteine ligase regulatory subunit
XP_030033245.1	XP_030033245.1	LOC115449536	-1.91811	0.047435	-0.147175	0.877834	-1.03264	0.140423	sorting nexin-32
XP_030027136.2;XP_037300179.1;XP_037300180.1;XP_037300181.1;XP_037300182.1	XP_030027136.2	LOC115445143	-1.92942	0.0187198	0.434821	0.533789	-0.7473	0.276671	E3 ubiquitin-protein ligase UBR5, transcript variant X4
XP_030037509.1	XP_030037509.1	LOC115453016	-1.95541	0.00968724	-0.148647	0.810153	-1.05203	0.0590369	prohibitin-2
XP_037297169.1	XP_037297169.1	LOC115449755	-1.96947	0.0353503	1.0709	0.191487	-0.449288	0.619357	rab proteins geranylgeranyltransferase component A 1
XP_030030097.2;XP_037295134.1;XP_037295135.1;XP_037295136.1	XP_030030097.2	LOC115447246	-2.00113	0.0312277	1.18337	0.145046	-0.408883	0.66373	RNA polymerase II-associated protein 3, transcript variant X1
XP_030031604.2;XP_037303016.1	XP_030031604.2	LOC115448338	-2.00664	0.0429788	0.103047	0.918993	-0.951797	0.201605	electron transfer flavoprotein subunit beta
XP_030026302.2	XP_030026302.2	LOC115444607	-2.08256	0.0345551	-0.480661	0.599391	-1.28161	0.0828092	esterase E4
XP_030026245.1;XP_030026246.1;XP_037300986.1;XP_037300987.1;XP_037301654.1	XP_030026245.1	LOC119188366	-2.13608	0.0368892	-0.251645	0.807154	-1.19386	0.165614	trafficking protein particle complex subunit 2-like protein, transcript variant X1
XP_037294232.1;XP_037294233.1;XP_037294234.1;XP_037294235.1;XP_037294236.1;XP_037294237.1;XP_037294239.1	XP_037294232.1	LOC115452625	-2.14272	0.0423777	0.126404	0.905113	-1.00816	0.249832	baculoviral IAP repeat-containing protein 6, transcript variant X1
XP_030026536.1	XP_030026536.1	LOC115444771	-2.16279	0.0478236	0.777959	0.442761	-0.692415	0.506324	probable isocitrate dehydrogenase [NAD] subunit alpha, mitochondrial, transcript variant X3
XP_037295297.1	XP_037295297.1	LOC115441220	-2.16329	0.047435	0.462485	0.65915	-0.850403	0.362977	calsyntenin-1
XP_030031589.2	XP_030031589.2	LOC115448319	-2.19691	0.0486098	0.545033	0.61253	-0.825941	0.381025	tripeptidyl-peptidase 2
XP_037302085.1	XP_037302085.1	LOC119188566	-2.24274	0.0448616	0.761098	0.459799	-0.740821	0.441294	actin-related protein 2/3 complex subunit 3-like
XP_037294695.1	XP_037294695.1	LOC115453690	-2.25256	0.0353503	0.163543	0.875265	-1.04451	0.208208	protein transport protein Sec24D, transcript variant X1
XP_030021100.2	XP_030021100.2	LOC115440785	-2.29486	0.0355745	0.932791	0.334731	-0.681036	0.487634	ubiquitin-like modifier-activating enzyme 5
XP_030031310.2;XP_030031311.2;XP_037296512.1	XP_030031310.2	LOC115448134	-2.30828	0.0237083	-0.688027	0.430518	-1.49816	0.0582302	3-hydroxyisobutyryl-CoA hydrolase, mitochondrial, transcript variant X1
XP_030028496.1	XP_030028496.1	LOC115446083	-2.32871	0.0292953	-0.209924	0.842248	-1.26932	0.100868	glycerol kinase
XP_030034799.1	XP_030034799.1	LOC115450825	-2.37186	0.0240198	-0.321681	0.744599	-1.34677	0.0820607	peroxiredoxin-5, mitochondrial
XP_030022192.1	XP_030022192.1	LOC115441516	-2.38057	0.0165145	0.934475	0.24239	-0.723049	0.419827	geranylgeranyl transferase type-2 subunit beta
XP_030037165.1	XP_030037165.1	LOC115452714	-2.38819	0.038659	-0.173909	0.877459	-1.28105	0.143806	mitochondrial import receptor subunit TOM70
XP_030027246.1	XP_030027246.1	LOC115445193	-2.39231	0.0488066	0.788348	0.489401	-0.801979	0.487726	26S proteasome non-ATPase regulatory subunit 2
XP_030032935.1;XP_030032936.1;XP_030032937.1	XP_030032935.1	LOC115449304	-2.4291	0.0175774	0.131106	0.886255	-1.149	0.146489	eukaryotic peptide chain release factor subunit 1, transcript variant X1
XP_030034830.1	XP_030034830.1	LOC115450850	-2.43077	0.0435865	-1.10559	0.307771	-1.76818	0.092312	transmembrane protein 14C
XP_030028312.2;XP_030028313.2	XP_030028312.2	LOC115445938	-2.45119	0.0312277	-0.754319	0.453348	-1.60275	0.0707107	2-oxoisovalerate dehydrogenase subunit alpha, mitochondrial, transcript variant X2
XP_037302877.1;XP_037302878.1	XP_037302877.1	LOC119193390	-2.46477	0.0492524	0.374675	0.774133	-1.04505	0.335578	uncharacterized LOC119193390, transcript variant X1
XP_030028600.2;XP_030028601.2	XP_030028600.2	LOC115446175	-2.46884	0.0478236	0.153436	0.905113	-1.1577	0.254361	delta-1-pyrroline-5-carboxylate synthase, transcript variant X1
XP_030019825.2	XP_030019825.2	LOC115439904	-2.47413	0.0461573	0.837363	0.464836	-0.818382	0.451703	tRNA (uracil-5-)-methyltransferase homolog A
XP_030029527.1	XP_030029527.1	LOC115446859	-2.51083	0.040663	1.21536	0.264196	-0.647731	0.571576	endoplasmin
XP_030023853.1	XP_030023853.1	LOC115442824	-2.55322	0.0347919	1.7959	0.0942331	-0.378658	0.769062	dosage compensation regulator, transcript variant X1
XP_030020183.1	XP_030020183.1	LOC115440139	-2.55404	0.0441285	-0.102184	0.937584	-1.32811	0.149837	valacyclovir hydrolase
XP_030037708.1	XP_030037708.1	LOC115453177	-2.59307	0.0165968	-0.441255	0.635287	-1.51716	0.0840023	V-type proton ATPase 116 kDa subunit a1, transcript variant X3
XP_037298803.1;XP_037303194.1	XP_037298803.1	LOC119188489	-2.60774	0.0393524	-0.716852	0.538199	-1.6623	0.0853442	trans-1,2-dihydrobenzene-1,2-diol dehydrogenase-like
XP_030025148.1	XP_030025148.1	LOC115443744	-2.61877	0.0123779	-0.220527	0.804764	-1.41965	0.060766	electron transfer flavoprotein subunit alpha, mitochondrial
XP_030020907.1;XP_030020908.1;XP_030020909.1	XP_030020907.1	LOC115440651	-2.6412	0.0393303	0.0543545	0.965957	-1.29342	0.205005	malate dehydrogenase, cytoplasmic, transcript variant X2
XP_030020240.2;XP_030020242.2;XP_030020244.2;XP_030020245.2;XP_037296983.1	XP_030020240.2	LOC115440180	-2.69832	0.0312479	-0.202289	0.869671	-1.4503	0.168444	glucose transporter type 1, transcript variant X3
XP_037299736.1;XP_037299737.1	XP_037299736.1	LOC115455010	-2.7115	0.0283444	0.255224	0.834849	-1.22814	0.249881	coatomer subunit beta', transcript variant X2
XP_030030894.1;XP_030030896.1	XP_030030894.1	LOC115447801	-2.76384	0.0267185	-0.638434	0.569425	-1.70114	0.0963988	alcohol dehydrogenase class-3, transcript variant X2
XP_030028473.1	XP_030028473.1	LOC115446060	-2.77504	0.0123779	0.338779	0.711194	-1.21813	0.163622	probable pyruvate dehydrogenase E1 component subunit alpha, mitochondrial
XP_030023693.2	XP_030023693.2	LOC115442696	-2.80384	0.0228542	-0.786192	0.45528	-1.79502	0.0725322	methylenetetrahydrofolate reductase
XP_037295154.1	XP_037295154.1	LOC119189473	-2.81843	0.0227961	1.69044	0.106645	-0.563994	0.66157	uncharacterized LOC119189473
XP_030034210.1	XP_030034210.1	LOC115450353	-2.83962	0.0353503	-0.209529	0.874457	-1.52458	0.124927	probable cytosolic oligopeptidase A
XP_030028402.1	XP_030028402.1	LOC115446006	-2.84131	0.0488066	0.233392	0.874272	-1.30396	0.347377	collagen alpha-1(IV) chain
XP_037301571.1	XP_037301571.1	LOC119188556	-2.88403	0.0207644	1.08991	0.294451	-0.897057	0.409953	probable alpha-aspartyl dipeptidase
XP_037294052.1	XP_037294052.1	LOC115445001	-2.8894	0.0218534	-1.32333	0.209152	-2.10636	0.0510647	proteasome activator complex subunit 4-like
XP_037295853.1;XP_037295854.1	XP_037295853.1	LOC115450685	-3.00229	0.0261446	0.191825	0.878378	-1.40523	0.196538	isocitrate dehydrogenase [NAD] subunit beta, mitochondrial, transcript variant X2
XP_030027504.1	XP_030027504.1	LOC115445397	-3.01183	0.0441285	-0.539281	0.713292	-1.77555	0.143874	alpha-aminoadipic semialdehyde synthase, mitochondrial
XP_037303325.1	XP_037303325.1	LOC115453331	-3.10044	0.00504002	0.548107	0.474893	-1.27617	0.169411	uncharacterized LOC115453331
XP_030024889.1	XP_030024889.1	LOC115443574	-3.13735	0.047435	1.32584	0.357916	-0.905751	0.508873	BTB/POZ domain-containing protein KCTD5
XP_030026602.2;XP_037296853.1	XP_030026602.2	LOC115444815	-3.14148	0.00748724	0.602266	0.468027	-1.26961	0.371081	ATPase H(+)-transporting accessory protein 2
XP_037303641.1	XP_037303641.1	LOC119193865	-3.15498	0.047435	-0.0578643	0.969897	-1.60642	0.193163	uncharacterized LOC119193865
XP_030023439.1	XP_030023439.1	LOC115442529	-3.27073	0.0155327	-1.11289	0.299003	-2.19181	0.0949735	eukaryotic translation initiation factor 3 subunit G
XP_030033622.1	XP_030033622.1	LOC115449864	-3.28058	0.0353503	-0.206974	0.892286	-1.74377	0.160439	4-coumarate--CoA ligase 1
XP_030035581.1	XP_030035581.1	LOC115451417	-3.30924	0.018941	-0.325787	0.805324	-1.81751	0.0917901	NAD(P) transhydrogenase, mitochondrial-like
XP_030033994.1;XP_030033997.1	XP_030033994.1	LOC115450151	-3.37243	0.0430029	1.04829	0.493815	-1.16207	0.398816	cytochrome P450 CYP12A2
XP_037296639.1;XP_037302284.1;XP_037302631.1	XP_037296639.1	LOC115445988	-3.37515	0.00393041	-0.984018	0.206159	-2.17958	0.07432	retinol dehydrogenase 13-like
XP_030036140.1	XP_030036140.1	LOC115451876	-3.37793	0.00968724	-0.969136	0.301095	-2.17353	0.0717882	uncharacterized LOC115451876
XP_030034975.2	XP_030034975.2	LOC115450941	-3.38105	0.0237083	0.0532117	0.969245	-1.66392	0.180398	protein unc-45 homolog B
XP_037295648.1;XP_037295661.1;XP_037295696.1;XP_037295710.1;XP_037295733.1	XP_037295648.1	LOC115451036	-3.44517	0.0128421	-0.0458496	0.969023	-1.74551	0.109437	catenin alpha, transcript variant X1
XP_037301646.1	XP_037301646.1	LOC119188343	-3.45085	0.0106869	0.285505	0.800955	-1.58267	0.123461	uncharacterized LOC119188343
XP_030027835.2;XP_030027839.2;XP_030027840.2;XP_030027841.2	XP_030027835.2	LOC115445632	-3.50382	0.038659	-0.736818	0.643099	-2.12032	0.0725272	organic cation transporter protein, transcript variant X1
XP_030024547.2;XP_030024548.2	XP_030024547.2	LOC115443331	-3.53217	0.0498079	-0.290586	0.874457	-1.91138	0.163732	kynurenine--oxoglutarate transaminase 3, transcript variant X2
XP_030030539.2	XP_030030539.2	LOC115447549	-3.53514	0.00545391	0.628962	0.479998	-1.45309	0.219724	lipid storage droplets surface-binding protein 2
XP_030034817.1;XP_030034818.1;XP_030034820.1	XP_030034817.1	LOC115450842	-3.5666	0.0283444	-0.896483	0.536905	-2.23154	0.130565	monocarboxylate transporter 9, transcript variant X2
XP_037299617.1	XP_037299617.1	LOC115454264	-3.59969	0.0312277	0.787963	0.607688	-1.40586	0.296572	luciferin 4-monooxygenase
XP_037292512.1;XP_037293882.1;XP_037293886.1;XP_037293889.1;XP_037293894.1;XP_037293896.1	XP_037292512.1	LOC115454870	-3.66893	0.0429788	-0.796653	0.643099	-2.23279	0.115477	uncharacterized LOC115454870
XP_030029079.2	XP_030029079.2	LOC115446533	-3.77324	0.0347919	0.590475	0.734088	-1.59138	0.264714	probable methylcrotonoyl-CoA carboxylase beta chain, mitochondrial
XP_030022619.1;XP_037300314.1	XP_030022619.1	LOC115441844	-3.95304	0.0324704	-0.00804133	0.994981	-1.98054	0.156958	succinate--CoA ligase [GDP-forming] subunit beta, mitochondrial, transcript variant X2
XP_030036601.1	XP_030036601.1	LOC115452267	-4.10039	0.0225464	-1.12278	0.465348	-2.61159	0.0526514	4-coumarate--CoA ligase 1
XP_030039468.1	XP_030039468.1	LOC115454897	-4.48197	0.0028906	0.0357627	0.97144	-2.2231	0.0829319	carnitine O-palmitoyltransferase 1, liver isoform
XP_037294270.1	XP_037294270.1	LOC115449591	-4.5024	0.0275257	-0.162932	0.935519	-2.33266	0.130565	juvenile hormone esterase
XP_030034277.2;XP_037299403.1	XP_030034277.2	LOC115450406	-4.52923	0.00494103	-0.0431232	0.969897	-2.28618	0.06676	serine hydrolase-like protein, transcript variant X1
XP_030030102.2	XP_030030102.2	LOC115447249	-4.68422	0.0242684	0.647696	0.740525	-2.01826	0.25937	uncharacterized LOC115447249
XP_030029559.1;XP_030029560.1	XP_030029559.1	LOC115446879	-4.69924	0.0165968	-0.315068	0.859632	-2.50716	0.104001	synaptic vesicle glycoprotein 2C, transcript variant X2
XP_030034835.1	XP_030034835.1	LOC115450854	-4.70951	0.0312277	0.340899	0.872791	-2.18431	0.218609	probable citrate synthase 2, mitochondrial
XP_030022782.1	XP_030022782.1	LOC115441985	-5.90193	0.0409922	-0.248287	0.932519	-3.07511	0.152358	V-type proton ATPase 16 kDa proteolipid subunit-like
